# Supplementary material
Source: PubMed Central journal article supplement (PMC5003251)
Supplement: pnas.1606656113.sapp.pdf [file pnas.1606656113.sapp.pdf]

## Supporting Information

### SI Materials and Methods

#### Media, bacterial strains, plasmids and growth conditions

Cells were grown in LB (1% tryptone, 0.5% yeast extract, 0.5% NaCl and 0.05 g/L thymine), LB without NaCl (LB0N) or LB with 0.2 M sucrose media at indicated temperatures. When needed, antibiotics were used at the following concentrations: ampicillin=100 µg/ml; spectinomycin=25 µg/ml; kanamycin=25 µg/ml; tetracycline=25 µg/ml; and chloramphenicol=20 µg/ml. When cells carried the *bla* or *cat* marker integrated in the chromosome, ampicillin or chloramphenicol was used at 25 µg/ml and 10 µg/ml, respectively. FtsE<sup>D162N</sup>X suppressor mutations, strains, plasmids and primers used in this study are listed in Table S1-S4, respectively. Construction of the plasmids and strains was described in detail in the section for construction of plasmids and construction of strains respectively.

#### Screen for FtsE<sup>D162N</sup>X resistant mutants by EMS mutagenesis

The procedure for EMS mutagenesis (1) was used with slight modifications. Cells of SD221 [W3110 *leu::Tn10 ftsA<sup>R286W</sup> ftsEX::cat*] were grown overnight in LB + 0.2 M sucrose medium at 37 °C. The next morning, the culture was sub-cultured 1:100 in LB + 0.2 M sucrose medium and grown to OD<sub>540</sub>=0.4. Cells were spun down and washed twice in equal volume of minimal A buffer (1 L buffer: 10.5 g of K<sub>2</sub>HPO<sub>4</sub>, 4.5 g of KH<sub>2</sub>PO<sub>4</sub>, 1 g of [NH<sub>4</sub>]<sub>2</sub>SO<sub>4</sub>, and 0.5 g of sodium citrate-2H<sub>2</sub>O). After the wash, the cells were resuspended in half the original volume of minimal A buffer. 2 ml of the culture was transferred to a 10 ml tube and 30 µL of EMS was added to the culture and incubated at 37°C with shaking for 45 min. After the EMS treatment, the cells were spun down, washed twice in 5 ml of minimal A buffer and resuspended in 2 ml of minimal A buffer. The mutagenized culture was then diluted 1:10 in fresh LB + 0.2 M sucrose medium and grown to OD<sub>540</sub>=0.8. Cells were collected and made electrocompetent. Plasmid pSD221-D162N was transformed into these mutagenized cells by electroporation and transformants were

selected on LB + 0.2 M sucrose plates containing chloramphenicol, kanamycin, and 0.2% glucose or 250  $\mu$ M IPTG at 37°C. A control culture without EMS treatment was subjected to the same selection and FtsE<sup>D162N</sup>X resistant colonies arose on plates with 250  $\mu$ M IPTG at a frequency of 10<sup>-5</sup>. EMS treatment increased the number of FtsE<sup>D162N</sup>X resistant colonies on IPTG plates by 50 to 100 fold. The larger colonies on IPTG plates were further purified on the same selection plates with 250  $\mu$ M IPTG. In total, 41 FtsE<sup>D162N</sup>X resistant mutants were isolated following one round of EMS mutagenesis.

To rule out the suppressors that contained a mutated plasmid, the plasmid (pSD221-D162N) from suppressor strains was isolated and retransformed into SD221 to test its ability to kill the cells in the presence of IPTG. Plasmids from 21 of the 41 FtsE<sup>D162N</sup>X resistant mutants no longer killed the cells in the presence of IPTG and these were discarded. Plasmids from the remaining 20 FtsE<sup>D162N</sup>X resistant mutants killed naïve cells as well as the original pSD221-D162N plasmid in the presence of IPTG, suggesting that the resistance was due to mutations in the bacterial chromosome. To determine the location of the mutations that confer resistance to FtsE<sup>D162N</sup>X, we first tested whether the resistance was linked with the *leu::Tn10* marker, which is located close to the 2 min region of the chromosome that harbors most of the essential cell division genes. Resistance to FtsE<sup>D162N</sup>X was co-transducible for 8 of the suppressors at a frequency of 60-90%. Therefore, the division genes within the 2 min region of these 8 FtsE<sup>D162N</sup>X resistant mutants were sequenced. Sequencing results showed that 5 of them contained missense mutations in *ftsL*, 2 contained missense mutations in *ftsA* and 1 had a missense mutation in *ftsW*. In all 8 cases, the missense mutations resulted from a single nucleotide change (Table S1). For the 12 FtsE<sup>D162N</sup>X resistant mutants that displayed no co-transducible resistance with *leu::Tn10*, *ftsB* was sequenced. Strikingly, 6 of them contained a single missense mutation in *ftsB* while one contained two missense mutations in *ftsB* (Table S1). The other 5 did not have a mutation in *ftsB* and were not further studied here.

### **BTH assay**

To detect the interaction among the division proteins, appropriate plasmid pairs were co-transformed into BTH101. The next day, single colonies were resuspended in 1 ml LB medium,

and 3  $\mu$ L of each aliquot was spotted on LB plates containing 100  $\mu$ g/ml ampicillin, 25  $\mu$ g/ml kanamycin, 40  $\mu$ g/ml X-gal and 25  $\mu$ M IPTG. Plates were incubated at 30°C overnight before imaging.

### **Immunofluorescence microscopy**

Overnight cultures of CH2/pDB280 (*ftsA*<sup>0</sup> *recA56-Tn10*/pSC101<sup>ts</sup>, P<sub>ftsA</sub>::*ftsA*) harboring the plasmid pSD266 (pACYC184, P<sub>ftsA</sub>::*ftsA*) or its variants were diluted 1:100 in fresh LB medium with appropriate antibiotics and grown at 30 °C for about 3 hours. The cultures were then diluted 1:10 in LB medium and shifted to 42°C. To keep the cells in exponential phase, the cultures were diluted once after they were shifted to 42°C for 1.5 hours. Samples were taken after the cultures were shifted to 42°C for 3 hours. The cells were fixed with 2% paraformaldehyde and 0.4% glutaraldehyde, and prepared for immunostaining and photography as previously described (2). Antisera were used as the following concentration: FtsZ (1/5000), FtsA (1/1000) and FtsK (1/250).

### **Western blot**

To measure the expression level of FtsA mutants, strains were grown as described for immunofluorescence microscopy. Overnight cultures of CH2/pDB280 (*ftsA*<sup>0</sup> *recA56-srID::Tn10*/pSC101<sup>ts</sup>, P<sub>ftsA</sub>::*ftsA*), or CH2/pDB280 harboring the plasmid pSD266 (pACYC184, P<sub>ftsA</sub>::*ftsA*) or its variants were diluted 1:100 in fresh LB medium with appropriate antibiotics and grown at 30 °C for about 3 hours. The cultures were then diluted 1:10 in LB medium and split in half. One was kept at 30 °C, while the other half was shifted to 42°C. Cultures were kept in exponential phase by dilution and samples were taken after they were grown for 3 hours. To make sure that same amount of cell mass was used for each culture, the volumes taken from each culture were adjusted according to their OD<sub>540</sub>. Cells were collected, resuspended in SDS-PAGE sample buffer and boiled for 10 min before they were loaded on the SDS-PAGE gel for analysis. Western blotting and detection of FtsA were performed as previously described (3). Anti-FtsA serum was used at a final concentration of 1/1000.

To measure the expression level of FtsN and its mutants, overnight cultures of S3 (W3110, leu::Tn10) harboring the plasmid pBR322 or pKD140 (pBR322-FtsN) and its derivatives were diluted 1:100 in fresh LB medium with ampicillin and grown at 30°C until OD<sub>540</sub> reached about 0.4. Samples were then taken according to their OD<sub>540</sub> to make sure equal amount of cell mass was used for each strain. Cells were spun down, resuspended in SDS sample buffers, boiled and 15 µL of each sample was loaded into the SDS-PAGE gel for comparison. Anti-FtsN serum was used at a final concentration of 1/1000.

### Localization of GFP-fusion proteins

To visualize ZapA-GFP localization in cells expressing FtsE<sup>D162N</sup>X, overnight cultures of HC261/pSD221 (TB28, *zapA-gfp*, *cat*/pEXT22, P<sub>tac</sub>::*ftsEX*) or HC261/pSD221-D162N were diluted 1:100 in fresh LB + sucrose medium with appropriate antibiotics at 30°C. At OD<sub>540</sub> ≈ 0.4, the cultures were diluted 1:10 in LB + sucrose medium with 125 µM IPTG and grown for another 2 hours. Cells were then immobilized on LB + 2% agarose pad for photography.

To visualize GFP-FtsI and GFP-FtsN localization in cells expressing FtsE<sup>D162N</sup>X, overnight cultures of EC436/pDSW610-D162N (P<sub>lac</sub>::*gfp-ftsI*/pBAD33, P<sub>BAD</sub>::*ftsE<sup>D162N</sup>X*), and EC440/pDSW610-D162N (P<sub>lac</sub>::*gfp-ftsN*/pBAD33, P<sub>BAD</sub>::*ftsE<sup>D162N</sup>X*) were diluted 1:100 in fresh LB medium with appropriate antibiotics. At OD<sub>540</sub> ≈ 0.4, the cultures were diluted 1:10 in LB medium with 2.5 µM IPTG and 0.2% arabinose and grown for 5 hours. During this long period of induction, the cultures were diluted 1:10 twice to keep the cells in exponential phase. Cells were then immobilized on LB + 2% agarose pad for photography.

To visualize GFP-FtsW localization in cells expressing FtsA<sup>R63H</sup> or FtsA<sup>G366D</sup> as the only source of FtsA, overnight cultures of CH2/pDB280 carrying plasmid pDSW311 (pDSW209, P<sub>lac</sub>::*gfp-ftsW*) and pSD273 or its variants were diluted 1:100 in fresh LB medium with appropriate antibiotics. At OD<sub>540</sub> ≈ 0.4, the cultures were diluted 1:10 in LB medium with 10 µM IPTG and shifted to 42°C. The cultures were then grown for 3 hours at 42°C to deplete the wild type FtsA. As a control, an exponentially growing culture of CH2/pDB280 carrying plasmid pDSW311 and pSD273 at 30°C was treated with 20 µg/ml of cephalixin to inhibit cell division. Cells were immobilized on LB + 2% agarose pad for photography.

To visualize FtsX-GFP and FtsEX-GFP localization in cells expressing wild type FtsA, the FtsA<sup>R286W</sup>, FtsA<sup>R286W, R63H</sup> or FtsA<sup>R286W, G366D</sup> mutant, overnight cultures of SD220 (S3, *ftsEX::cat*), SD221 (S3, *ftsA<sup>R286W</sup> ftsEX::cat*), SD261 (S3, *ftsA<sup>R286W, R63H</sup> ftsEX::cat*) or SD262 (S3, *ftsA<sup>R286W, G366D</sup> ftsEX::cat*) carrying plasmid pSD226 (pDSW210, P<sub>lac</sub>::*ftsX-gfp*) or pSD242 (pDSW210, P<sub>lac</sub>::*ftsEX-gfp*) were diluted 1:100 in fresh LB + 0.2 M sucrose medium with appropriate antibiotics at 30 °C. At OD<sub>540</sub> ≈ 0.4, the cultures were diluted 1:10 in LB + 0.2 M sucrose medium with 20 μM IPTG. The cultures were then grown for 2 hours before samples were taken for photography. Localization of FtsX-GFP and FtsEX-GFP in wild type cells S3 was performed similarly but in LB medium.

### Construction of strains

Construction of strains involved P1-mediated transduction (4), λ-Red mediated recombineering (5) and allelic replacement using plasmids that are temperature sensitive for replication (6).

Strains carrying the *ftsEX::cat* marker were obtained by P1-mediated transduction of *ftsEX::cat* from EC1779 (BW25113, *ftsEX::cat*) into respective strains (Table S2). Transductants were selected on LB + 0.2M sucrose plates containing chloramphenicol.

Strains carrying the *ftsN::kan* marker were constructed by P1-mediated transduction of *ftsN::kan* from strain CH34/pMG20 (TB28, *ftsN<>aph/P<sub>BAD</sub>::ftsN*) or SD303 (TB28, *ftsN<>aph/pSEB413*) into respective strains (Table S3). Transductants were selected on plates with spectinomycin and kanamycin if the strains were complemented with pBL154 (pSC101<sup>ts</sup>, P<sub>syn</sub>::*ftsN*). If the strain s complemented with pMG20 (pBAD33, P<sub>BAD</sub>::<sup>ss</sup>*tor-bfp-ftsN<sup>71-105</sup>-le*), transductants would be selected on plates with chloramphenicol, kanamycin and 0.4% arabinose. If the strains were complemented with pSD414-D5N (pDSW210, P<sub>lac</sub>::*ftsN<sup>1-140-D5N</sup>*), transductants were selected on plates with ampicillin, kanamycin and 30 μM IPTG.

Strains SD238 to SD244 were obtained by replacing the chromosomal *ftsB<sup>WT</sup>* allele of TB28 with respective *ftsB* alleles from plasmid pSD255 (pSC101<sup>ts</sup>, P<sub>syn</sub>::*ftsB*) by the methods of Hamilton et

al. (6) Presence of the desired allele in each strain was verified by amplification and sequencing of the chromosomal DNA using primers 5-ftsB-seq and 3-ftsB-seq.

SD246 and SD247 were obtained by replacing the chromosomal *ftsL*<sup>WT</sup> allele or *ftsW*<sup>WT</sup> allele of S3 with the *ftsL*<sup>G92D</sup> allele or *ftsW*<sup>M269I</sup> allele from plasmid pSD256-G92D (pSC101<sup>ts</sup>, P<sub>syn</sub>::*ftsL*<sup>G92D</sup>) or pSD257-M269I (pSC101<sup>ts</sup>, P<sub>syn</sub>::*ftsW*<sup>M269I</sup>) by the methods of Hamilton et al. (6). The presence of the mutation in each strain was verified by amplification and sequencing of the chromosomal DNA using primers 5-ftsL-HindIII and 3-ftsL-EcoRI for SD246 and 5-HindIII-ftsW and 3-ftsW-EcoRI for SD247.

Strains SD248 and SD249 were constructed by λ-Red mediated recombineering using strain PS236 (W3110, *leu*::*Tn10 ftsA12*) as the host. DNA fragments containing the *ftsA*<sup>R286W, R63H</sup> and *ftsA*<sup>R286W, G366D</sup> were amplified from the chromosomal DNA of the FtsE<sup>D162N</sup>X resistant isolates DNEXRM59 (dominant negative FtsEX resistant mutant 59) and DNEXRM42 using primers m-ftsQ-seq and 3-ftsA-EcoRI. Gel purified DNA fragments were electroporated into PS236/pKD46 competent cells and recombinants selected at 42°C overnight. 4-10 recombinants of each strain were sub-cloned and the presence of the mutation was confirmed by sequencing of *ftsA* using primers m-ftsQ-seq, m-ftsA-seq and 3-ftsA-EcoRI.

Strain SD290 (S3, *ftsA*<sup>0</sup>/pSD263 [pSC101<sup>ts</sup>, P<sub>ftsA</sub>::*ftsA*]) was constructed by P1-mediated transduction of *ftsA*<sup>0</sup> from CH2/pDB280 into strain S3 (W3110 *leu*::*Tn10*). Transductants were selected on M9 minimum medium with 0.2% glucose. Transductants obtained on M9 medium were then checked for sensitivity to tetracycline and for temperature sensitive growth.

Strain SD296 (S3, *ftsA*<sup>0</sup> *leu*::*Tn10*/pSD263 [pSC101<sup>ts</sup>, P<sub>ftsA</sub>::*ftsA*]) was constructed by P1-mediated transduction of *leu*::*Tn10* from S3 into strain SD290. Transductants were selected on LB medium with tetracycline and then checked for temperature sensitive growth.

Strain SD318 (TB28, *ftsA*<sup>0</sup> *leu*::*Tn10*/pDB280), SD319 (TB28, *ftsA*<sup>0</sup> *leu*::*Tn10 ftsB*<sup>E56A</sup>/pDB280) and SD320 (TB28, *ftsA*<sup>0</sup> *leu*::*Tn10 ftsB*<sup>D59H</sup>/pDB280) were constructed by P1-mediated transduction of *leu*::*Tn10-ftsA*<sup>0</sup> from SD296 into strains TB28, BL140 and BL154, respectively.

Strain SD321 (TB28, *ftsA*<sup>0</sup>/pDB280), SD322 (TB28, *ftsA*<sup>0</sup> *ftsB*<sup>E56A</sup>/pDB280) and SD323 (TB28, *ftsA*<sup>0</sup> *ftsB*<sup>D59H</sup>/pDB280) were constructed by P1-mediated transduction of *leu*<sup>+</sup> from strain SD303 [TB28, *ftsN::kan*/pSEB413] into strain SD318, SD319 and SD320 respectively. Transductants were selected on M9 minimum medium with 0.2% glucose and then checked for sensitivity to tetracycline and for temperature sensitive growth.

Strain SD324 (TB28, *ftsA*<sup>0</sup> *recA56-srID::Tn10*/pDB280), SD325 (TB28, *ftsA*<sup>0</sup> *ftsB*<sup>E56A</sup> *recA56-srID::Tn10*/pDB280) and SD326 (TB28, *ftsA*<sup>0</sup> *ftsB*<sup>D59H</sup> *recA56-srID::Tn10*/pDB280) were constructed by P1-mediated transduction of *recA56-srID::Tn10* from strain W3110 *recA56-srID::Tn10* into strain SD321, SD322 and SD323 respectively. Transductants were selected on LB plates with tetracycline and then checked for UV sensitivity and temperature sensitive growth.

### **Construction of plasmids**

Plasmid pDSW610-D162N was obtained by site-directed mutagenesis of plasmid pDSW610 with primers *ftsE*-D162N-F and *ftsE*-D162N-R.

Plasmid pEX-T18 was constructed by ligation of a BamHI/EcoRI digested DNA fragment containing *ftsEX* into BamHI/EcoRI digested pUT18. The *ftsEX* containing DNA fragment was amplified from W3110 chromosomal DNA using primers 5-BamHI-*ftsE* and 3-*ftsX*-EcoRI.

Plasmids pKD140-D5N and pKD140-WYAA were obtained by site-directed mutagenesis of plasmid pKD140 using primer pairs *ftsN*-D5N-F/*ftsN*-D5N-R and *ftsN*-WYAA-F/*ftsN*-WYAA-R.

Plasmid pKT25-E was constructed by ligation of an XbaI/KpnI digested DNA fragment containing *ftsE* into XbaI/KpnI digested pKT25. The *ftsE* containing DNA fragment was amplified from W3110 chromosomal DNA using primers 5-XbaI-*ftsE* and 3-*ftsE*-KpnI.

Plasmid pKT25-EX was constructed by ligation of a XbaI/KpnI digested DNA fragment containing *ftsEX* into XbaI/KpnI digested pKT25. The *ftsEX* containing DNA fragment was amplified from W3110 chromosomal DNA using primers 5-XbaI-*ftsE* and 3-*ftsX*-KpnI.

Plasmid pSD221 was obtained by ligation of a SacI/HindIII digested DNA fragment containing *ftsEX* into SacI/HindIII digested pEXT22. The *ftsEX* containing DNA fragment was amplified from W3110 chromosomal DNA using primers 5-SacI-ftsE and ftsX-R-HindIII.

Plasmid pSD221-D162N was obtained by site-directed mutagenesis of plasmid pSD221 using primers ftsE-D162N-F and ftsE-D162N-R.

Plasmid pSD226 was obtained by ligation of an EcoRI/PstI digested DNA fragment containing *ftsX* into EcoRI/PstI digested pDSW210. The DNA fragment was amplified from W3110 chromosomal DNA using primers 5-ftsX-EcoRI/3-ftsX-PstI.

Plasmid pSD242 was obtained by ligation of an EcoRI/SalI digested DNA fragment containing *ftsEX* into EcoRI/SalI digested pDSW210. The DNA fragment was amplified from W3110 chromosomal DNA using primers 5-ftsE-EcoRI/3-ftsX-SalI.

Plasmid pSD255 was obtained by ligation of a HindIII/EcoRI digested *ftsB* containing DNA fragment into HindIII/EcoRI digested pHGB2. The DNA fragment was amplified from W3110 chromosomal DNA using primers 5-HindIII-ftsB/3-ftsB-EcoRI. Derivatives of pSD255 carrying different alleles of *ftsB* were obtained by site-directed mutagenesis using primer pairs listed in Table S4.

Plasmid pSD256 was obtained by ligation of a HindIII/EcoRI digested *ftsL* containing DNA fragment into HindIII/EcoRI digested pHGB2. The DNA fragment was amplified from W3110 chromosomal DNA using primers 5-HindIII-ftsL/3-ftsL-EcoRI. Derivative of pSD256 carrying the *ftsL*<sup>D92G</sup> allele was obtained by site-directed mutagenesis using primer pairs listed in Table S4.

Plasmid pSD257 was obtained by ligation of a HindIII/EcoRI digested *ftsW* containing DNA fragment into HindIII/EcoRI digested pHGB2. The DNA fragment was amplified from W3110 chromosomal DNA using primers 5-HindIII-ftsW/3-ftsW-EcoRI. Derivative of pSD255 carrying the *ftsW*<sup>M269I</sup> allele was obtained by site-directed mutagenesis using primer ftsW-M269I-F and ftsW-M269I-R.



Plasmid pSD263 was obtained by ligation of a PstI/EcoRI digested DNA fragment containing *ftsA* into PstI/EcoRI digested pHGB2. The *ftsA* containing DNA fragment was cut from pSEB24 using PstI/EcoRI

Plasmid pSD265 was obtained by ligation of a PstI/EcoRI digested DNA fragment containing *ftsA* into PstI/EcoRI digested pBANG112. The *ftsA* containing DNA fragment was cut from pSEB24 using PstI/EcoRI.

Plasmid pSD266 was obtained by self-ligation of Aval digested pSD265. Aval digestion removes a 1221bp fragment from pSD265 without changing the expression level of FtsA. Derivatives of pSD266 containing different alleles of *ftsA* were obtained by site-directed mutagenesis using primer pairs listed in Table S4.

Plasmid pSD273 was obtained by ligation of PstI/Aval digested pSD266 with a PstI/Aval digested fragment from pBANG100. pSD273 differs from pSD266 in that it carries the kanamycin resistant *aph* gene instead of the ampicillin resistant *bla* gene. Derivatives of pSD273 containing different alleles of *ftsA* were obtained by site-directed mutagenesis using primer pairs listed in Table S4.

Derivatives of pSEB428 carrying different *ftsE* mutations were obtained by site-directed mutagenesis using primer pairs listed in Table S4.

Plasmid pSEB428-EX<sup>Δ152-161</sup> was obtained by ligation of an NcoI/HindIII digested DNA fragment containing *ftsEX*<sup>Δ152-161</sup> into NcoI/HindIII digested pSEB428. The *ftsEX*<sup>Δ152-169</sup> DNA fragment was obtained by overlap extension PCR. Two DNA fragments containing *ftsEX*<sup>1-152</sup> and *ftsX*<sup>161-352</sup> were amplified from pSEB428 using primer pairs 5-NcoI-ftsE/ftsX152-R and ftsX161-F/3-ftsX-HindIII, respectively. The *ftsEX*<sup>1-152</sup> and *ftsX*<sup>161-352</sup> fragments were used together as template to obtain the *ftsEX*<sup>Δ152-161</sup> fragment by PCR using primers 5-NcoI-ftsE/3-ftsX-HindIII.

Plasmid pSEB428-E<sup>D162N</sup>X<sup>Δ152-161</sup> was obtained by site-directed mutagenesis using primer pair ftsE-D162N-F/ftsE-D162N-R.

Plasmid pT18-E was constructed by ligation of an XbaI/KpnI digested DNA fragment containing *ftsE* into XbaI/KpnI digested pUT18C. The *ftsE* containing DNA fragment was amplified from W3110 chromosomal DNA using primers 5-XbaI-ftsE and 3-ftsX-KpnI.

Plasmid pT18-EX was constructed by ligation of an XbaI/KpnI digested DNA fragment containing *ftsEX* into XbaI/KpnI digested pUT18C. The *ftsEX* containing DNA fragment was amplified from W3110 chromosomal DNA using primers 5-XbaI-ftsE and 3-ftsX-KpnI.

Derivatives of pWM3014 were obtained by site-directed mutagenesis using primer pairs listed in Table S4.

Plasmid pX-T18 was obtained by ligation of a BamHI/EcoRI digested DNA fragment containing *ftsX* into BamHI/EcoRI digested pUT18. The *ftsX* DNA fragment was amplified from plasmid pSD221 using primer pair 5-BamHI-ftsX and 3-ftsX-EcoRI.

#### References:

1. Miller JH (1972) *Experiments in molecular genetics* (Cold Spring Harbor Laboratory, Cold Spring Harbor, N.Y.) pp xvi, 466 p.
2. Addinall SG, Bi E, & Lutkenhaus J (1996) FtsZ ring formation in *fts* mutants. *Journal of bacteriology* 178(13):3877-3884.
3. Addinall SG & Lutkenhaus J (1996) FtsA is localized to the septum in an FtsZ-dependent manner. *Journal of bacteriology* 178(24):7167-7172.
4. Miller JH (1992) *A short course in bacterial genetics : a laboratory manual and handbook for Escherichia coli and related bacteria* (Cold Spring Harbor Laboratory Press, Plainview, N.Y.).
5. Datsenko KA & Wanner BL (2000) One-step inactivation of chromosomal genes in *Escherichia coli* K-12 using PCR products. *Proceedings of the National Academy of Sciences of the United States of America* 97(12):6640-6645.
6. Hamilton CM, Aldea M, Washburn BK, Babitzke P, & Kushner SR (1989) New method for generating deletions and gene replacements in *Escherichia coli*. *Journal of bacteriology* 171(9):4617-4622.
7. Liu B, Persons L, Lee L, & de Boer PA (2015) Roles for both FtsA and the FtsBLQ subcomplex in FtsN-stimulated cell constriction in *Escherichia coli*. *Molecular microbiology* 95(6):945-970.
8. Karimova G, Dautin N, & Ladant D (2005) Interaction network among *Escherichia coli* membrane proteins involved in cell division as revealed by bacterial two-hybrid analysis. *Journal of bacteriology* 187(7):2233-2243.
9. Hale CA & de Boer PA (1999) Recruitment of ZipA to the septal ring of *Escherichia coli* is dependent on FtsZ and independent of FtsA. *Journal of bacteriology* 181(1):167-176.

10. Weiss DS, Chen JC, Ghigo JM, Boyd D, & Beckwith J (1999) Localization of FtsI (PBP3) to the septal ring requires its membrane anchor, the Z ring, FtsA, FtsQ, and FtsL. *Journal of bacteriology* 181(2):508-520.
11. Wang S, Arends SJ, Weiss DS, & Newman EB (2005) A deficiency in S-adenosylmethionine synthetase interrupts assembly of the septal ring in Escherichia coli K-12. *Molecular microbiology* 58(3):791-799.
12. Peters NT, Dinh T, & Bernhardt TG (2011) A fail-safe mechanism in the septal ring assembly pathway generated by the sequential recruitment of cell separation amidases and their activators. *Journal of bacteriology* 193(18):4973-4983.
13. Tsang MJ & Bernhardt TG (2015) A role for the FtsQLB complex in cytokinetic ring activation revealed by an ftsL allele that accelerates division. *Molecular microbiology* 95(6):925-944.
14. Pichoff S, Shen B, Sullivan B, & Lutkenhaus J (2012) FtsA mutants impaired for self-interaction bypass ZipA suggesting a model in which FtsA's self-interaction competes with its ability to recruit downstream division proteins. *Molecular microbiology* 83(1):151-167.
15. Du S & Lutkenhaus J (2014) SlmA Antagonism of FtsZ Assembly Employs a Two-pronged Mechanism like MinCD. *PLoS genetics* 10(7):e1004460.
16. Bernhardt TG & de Boer PA (2003) The Escherichia coli amidase AmiC is a periplasmic septal ring component exported via the twin-arginine transport pathway. *Molecular microbiology* 48(5):1171-1182.
17. Shen B & Lutkenhaus J (2009) The conserved C-terminal tail of FtsZ is required for the septal localization and division inhibitory activity of MinC(C)/MinD. *Molecular microbiology* 72(2):410-424.
18. Mercer KL & Weiss DS (2002) The Escherichia coli cell division protein FtsW is required to recruit its cognate transpeptidase, FtsI (PBP3), to the division site. *Journal of bacteriology* 184(4):904-912.
19. Arends SJ, Kustus RJ, & Weiss DS (2009) ATP-binding site lesions in FtsE impair cell division. *Journal of bacteriology* 191(12):3772-3784.
20. Dykxhoorn DM, St Pierre R, & Linn T (1996) A set of compatible tac promoter expression vectors. *Gene* 177(1-2):133-136.
21. Dai K, Xu Y, & Lutkenhaus J (1993) Cloning and characterization of ftsN, an essential cell division gene in Escherichia coli isolated as a multicopy suppressor of ftsA12(Ts). *Journal of bacteriology* 175(12):3790-3797.
22. Pichoff S, Du S, & Lutkenhaus J (2015) The bypass of ZipA by overexpression of FtsN requires a previously unknown conserved FtsN motif essential for FtsA-FtsN interaction supporting a model in which FtsA monomers recruit late cell division proteins to the Z ring. *Molecular microbiology* 95(6):971-987.
23. Gerding MA, et al. (2009) Self-enhanced accumulation of FtsN at Division Sites and Roles for Other Proteins with a SPOR domain (DamX, DedD, and RlpA) in Escherichia coli cell constriction. *Journal of bacteriology* 191(24):7383-7401.
24. Busiek KK, Eraso JM, Wang Y, & Margolin W (2012) The early divisome protein FtsA interacts directly through its 1c subdomain with the cytoplasmic domain of the late divisome protein FtsN. *Journal of bacteriology* 194(8):1989-2000.

## Supplemental Figure legends

Figure S1. The ATPase activity of FtsEX but not its role in amidase activation is essential for cell division. Cells of SD205 (*W3110 ftsEX::cat*) harboring plasmid pDSW208, pSEB428 (pDSW208-*ftsEX*) or its variants were spotted on LBON or LB + 0.2 M sucrose plates to determine the ability of the FtsEX variants to restore growth on LBON medium. Plasmid pDSW208, pSEB428 and its variants were transformed into strain SD205, and a single transformant of each strain from LB + 0.2M sucrose plates was resuspended in 1 ml LB medium and serially diluted. 3  $\mu$ L of each aliquot was then spotted on the LBON plates or LB + 0.2 M sucrose plates with appropriate antibiotics and increasing concentrations of IPTG. The plates were incubated at 30°C overnight before photography. Note that at higher concentrations of inducer expression of FtsEX and the variants are toxic.

Figure S2. Toxicity of FtsEX or its mutants in wild type cells growing in LB or LB + 0.2 M sucrose. Plasmid pSEB428 (pDSW208,  $P_{lac}::ftsEX$ ) or its variants was transformed into strain S3 [*W3110 leu::Tn10*] and a single transformant of each strain from LB + 0.2M sucrose plates was then resuspended in 1 ml LB medium and serially diluted. 3  $\mu$ L of each aliquot was then spotted on LB plates or LB + 0.2M sucrose plates with appropriate antibiotics and increasing concentration of IPTG. The plates were incubated at 30°C overnight before photography.

Figure S3. Morphology of  $\Delta ftsEX$  cells overexpressing FtsE<sup>D162N</sup>X. Cells of SD205 (*W3110 ftsEX::cat*) containing the plasmid pSEB428 or variants containing FtsE mutations were grown to exponential phase in LB + 0.2 M sucrose at 30°C. The cultures were then diluted 1:10 in fresh LB +0.2 M sucrose medium with antibiotics and IPTG was added to the culture to a final concentration as indicated. Samples were taken for photography after 2 hours of induction. The scale bar is 3  $\mu$ m.

Figure S4. Plasmid pSD221-D162N provides enough FtsE<sup>D162N</sup>X to kill cells and ZapA-GFP does not confer resistance to the toxicity of FtsE<sup>D162N</sup>X. Plasmid pSD221 (pEXT22,  $P_{tac}::ftsEX$ ) or its

variant pSD221-D162N (pEXT22,  $P_{tac}::ftsE^{D162N}X$ ) was transformed into strain TB28 and HC261 (TB28, *zapA-gfp*), and a single transformant of each strain from LB + 0.2M sucrose plates was resuspended in 1 ml LB medium and serially diluted. 3  $\mu$ L of each aliquot was then spotted on the LB + 0.2 M sucrose plates with appropriate antibiotics and increasing concentrations of IPTG. The plates were incubated at 30°C overnight before photography. Note that growth of both strains was inhibited by  $FtsE^{D162N}X$  at 125  $\mu$ M IPTG.

Figure S5. Western blot to determine the level of FtsN mutant proteins. Overnight cultures of S3 (W3110, *leu::Tn10*) harboring the plasmid pBR322 or pKD140 (pBR322-FtsN) and its derivatives were diluted 1:100 in fresh LB medium with ampicillin and grown at 30°C until  $OD_{540}$  reached about 0.4. Samples were then taken and adjusted to make sure equal amount of  $OD_{540}$  equivalents was used for each strain. Cells were spun down, resuspended in SDS sample buffers, boiled and 15  $\mu$ L of each sample was loaded into the SDS-PAGE gel. Anti-FtsN serum was used at a final concentration of 1/1000.

Figure S6. Hyperactive *ftsB* and *ftsL*, but not hyperactive *ftsA* mutations provide resistance to overexpressed  $FtsE^{D162N}X$  in the absence of wild type FtsEX. Plasmid pSD221 (pEXT22,  $P_{tac}::ftsEX$ ) or its derivative pSD221-D162N was transformed into TB28 and W3110 derivatives carrying the *ftsEX::cat* allele and different mutations in *ftsA*, *ftsB* or *ftsL*. Single transformants obtained on LB + 0.2 M sucrose plates were then spot tested to access sensitivity to  $FtsE^{D162N}X$  as Figure. 4A. Strain names were listed next to the spots on the right.

Figure S7. Locations of the *ftsA* mutations and evidence they require less FtsN. (A) Shown is a modeled structure of *E. coli* FtsA by I-TASSER using the *Thermotoga maritima* FtsA structure as a template (PDB#4A2A). Mutations that bypass ZipA and require less  $FtsN^{1-140-D5N}$  for division are indicated in cyan and mutations that impair interaction with FtsX are indicated in red. The 1C sub-domain of FtsA is indicated. ((B) FtsA mutants that bypass ZipA require less FtsN for division. A single colony of strains SD327 (S3, *ftsN::kan/pSEB414-D5N*), SD328 (S3, *ftsA<sup>E124A</sup>ftsN::kan/pSEB414-D5N*), SD329 (S3, *ftsA<sup>I143L</sup>ftsN::kan/pSEB414-D5N*), SD330 (S3, *ftsA<sup>M167I</sup>ftsN::kan/pSEB414-D5N*), SD331 (S3, *ftsA<sup>R177C</sup>ftsN::kan/pSEB414-D5N*), SD332 (S3, *ftsA<sup>L204A</sup>ftsN::kan/pSEB414-D5N*) and SD333 (S3, *ftsA<sup>R286W</sup>ftsN::kan/pSEB414-D5N*) was resuspended in

1 ml LB medium and serially diluted. 3  $\mu$ L of each aliquot was then spotted on LB plates with or without 15  $\mu$ M IPTG. The plates were then incubated at 37°C overnight before photography.

Figure S8. Hyperactive *ftsA*, *ftsB* and *ftsL* mutations enable the cells to grow without FtsEX. *W3110 ftsEX::cat* or *TB28 ftsEX::cat* cells harboring different alleles of *ftsA*, *ftsB* or *ftsL* were grown overnight on LB + 0.2M sucrose plates. The next day, single colonies of each strain were resuspended in 1 ml LB medium and serially diluted. 3  $\mu$ L of each aliquot was then spotted on LBON, LB or the LB + 0.2 M sucrose plates with appropriate antibiotics. The plates were incubated at 30°C overnight before photography. Strain names are listed to the right of the panel.

Figure S9. Newly isolated FtsB, FtsL and FtsW mutants increase survival of cells depleted of FtsN. *W3110 ftsN::kan* or *TB28 ftsN::kan* cells harboring different alleles of *ftsB*, *ftsL* or *ftsW* and the plasmid pBL154 (pSC101<sup>ts</sup>, P<sub>syn</sub>::*ftsN*) were grown on LB plates with appropriate antibiotics at 30°C overnight. The next day, single colonies of each strain were resuspended in 1 ml LB medium and serially diluted. 3  $\mu$ L of each aliquot was then spotted on LB plates with appropriate antibiotics. The plates were incubated at 30°C, 37°C or 42°C overnight before photography. Strain names are listed to the right of the panel.

Figure S10. Newly isolated FtsB, FtsL or FtsW mutants allow the cells to grow without FtsEX. Test was done as described in Figure S5. Strain names are listed to the right of the panel.

Figure S11. BTH assay to assess the interaction between division proteins. (A) FtsE does not interact with FtsA, FtsZ or itself unless it is coexpressed with FtsX. Pairs of plasmids were co-transformed into BTH101. A single transformant of each combination of plasmids was resuspended in LB medium and 3  $\mu$ L of each aliquot was spotted on LB plates containing appropriate antibiotics, 25  $\mu$ M IPTG and 40  $\mu$ g/ml X-gal. The plates were then incubated at 30°C overnight before photography. Note that the R300E mutation does not affect FtsA self-interaction or its interaction with other division proteins in this test. (B) FtsA interaction with FtsX and FtsEX. Test was performed as in (A). Note that introduction of R300E and R286W into FtsA does not reduce the interaction with FtsX and FtsEX.

Figure S12. Western blot to determine the level of FtsA mutant proteins. Overnight cultures of CH2/pDB280 (*ftsA*<sup>0</sup> *recA56-Tn10*/pSC101<sup>ts</sup>, P<sub>ftsA</sub>::*ftsA*) or CH2/pDB280 harboring the plasmid pSD266 (pACYC184, P<sub>ftsA</sub>::*ftsA*) or its derivatives were diluted 1:100 in fresh LB medium with appropriate antibiotics and grown at 30°C for 3 hours. The cultures were then diluted 1:10 in fresh LB medium with appropriate antibiotics, split in half, with one growing at 30°C and one shifted to 42°C for 3 hours. Samples were then taken according to their OD<sub>540</sub> to make sure equal amount of cell mass was used for each strain. Cells were spun down, resuspended in SDS sample buffers, boiled and 15 µL of each sample was loaded into the SDS-PAGE gel for comparison. Anti-FtsA serum was used at a final concentration of 1/1000. Lanes 1-6 contain samples obtained at 30°C, while lanes 7-12 contain samples from 42°C. The identity of each sample was provided below the image.

Figure S13. *ftsA*<sup>R286W</sup>-like mutations display different ability to suppress the FtsA mutants impaired for interaction with FtsX. Test was done as in Figure 7B.

Figure S14. Hyperactive FtsB mutants can suppress the growth defects of cells expressing the FtsA mutants impaired for interaction with FtsX as the only copy of FtsA. Plasmid pSD266 or its derivatives were transformed into FtsA depletion strains SD324 (TB28, *ftsA*<sup>0</sup> *recA56-srID::Tn10*/pDB280), SD325 (TB28, *ftsA*<sup>0</sup> *ftsB*<sup>E56A</sup> *recA56-srID::Tn10*/pDB280) and SD326 (TB28, *ftsA*<sup>0</sup> *ftsB*<sup>D59H</sup> *recA56-srID::Tn10*/pDB280) harboring wild type FtsB or FtsB mutants. A single transformant of each strain was then resuspended in 1 ml LB medium and serially diluted. 3 µL of each aliquot was spotted on the LB plates with appropriate antibiotics. The plates were incubated at 30°C, 37°C and 42°C overnight before photography.

Figure S15. Localization of FtsX-GFP and FtsEX-GFP in wild type cells (S3), *ftsEX::cat* cells (SD220) or in *ftsEX::cat* cells harboring mutations to suppress the growth defect of mutations impaired for the FtsA-FtsX interaction (strains SD221, SD261 and SD262). Overnight cultures of each strain carrying plasmid pSD226 (pDSW210, P<sub>lac</sub>::*ftsX-gfp*) or pSD242 (pDSW210, P<sub>lac</sub>::*ftsEX-gfp*) was diluted 1:100 in fresh LB (for strain S3) or LB + 0.2 M sucrose with appropriate antibiotics and grown at 30°C for 2 hours. The cultures were then diluted 1:10 and IPTG was added to a final concentration of 20 µM to induce FtsX-GFP or FtsEX-GFP. 2 hours later, samples were

taken for photography. Note that FtsX-GFP localizes to midcell poorly without FtsE and *ftsEX::cat* cells expressing FtsEX-GFP are shorter and do not form chains compared to cells expressing FtsX-GFP, indicating complementation of *ftsEX::cat* by FtsEX-GFP. Arrows indicate localization of FtsX-GFP to potential division sites.

Figure S16. GFP-FtsW does not localize in cells expressing the FtsA mutants impaired for interaction with FtsX as the only source of FtsA. Overnight cultures of CH2/pDB280 carrying plasmid pDSW311 (pDSW209,  $P_{lac}::gfp-ftsW$ ) and pSD273 (pACYC184,  $P_{ftsA}::ftsA$ , *kan'*) or its variants were diluted 1:100 in fresh LB medium with appropriate antibiotics. At  $OD_{540} \approx 0.4$ , the cultures were diluted 1:10 in LB medium with 10  $\mu$ M IPTG and shifted to 42°C. The cultures were then grown for 3 hours at 42°C to deplete the wild type FtsA. As a control, an exponentially growing culture of CH2/pDB280 carrying plasmid pDSW311 and pSD273 at 30 °C was treated with 20  $\mu$ g/ml of cephalexin to inhibit cell division. Cells were immobilized on LB + 2% agarose pad for photography.

Figure S17. Localization of FtsZ, FtsA and FtsK in cells expressing FtsA<sup>L367E</sup> or FtsA<sup>D369R</sup> as the only source of FtsA. Detailed information about the experiment was provided in the supplemental information.

Figure S18. Both <sup>N</sup>FtsN and <sup>E</sup>FtsN are required to bypass FtsEX. Plasmid pDSW208, pSEB417 and its variants were transformed into strain EC1779 (BW25113, *ftsEX::cat*), and a single transformant of each strain from LB + 0.2M sucrose plates was resuspended in 1 ml LB medium and serially diluted. 3  $\mu$ L of each aliquot was then spotted on the LB plates or LB + 0.2 M sucrose plates with appropriate antibiotics and with or without IPTG. The plates were incubated at 37°C overnight before photography.



Fig. S1

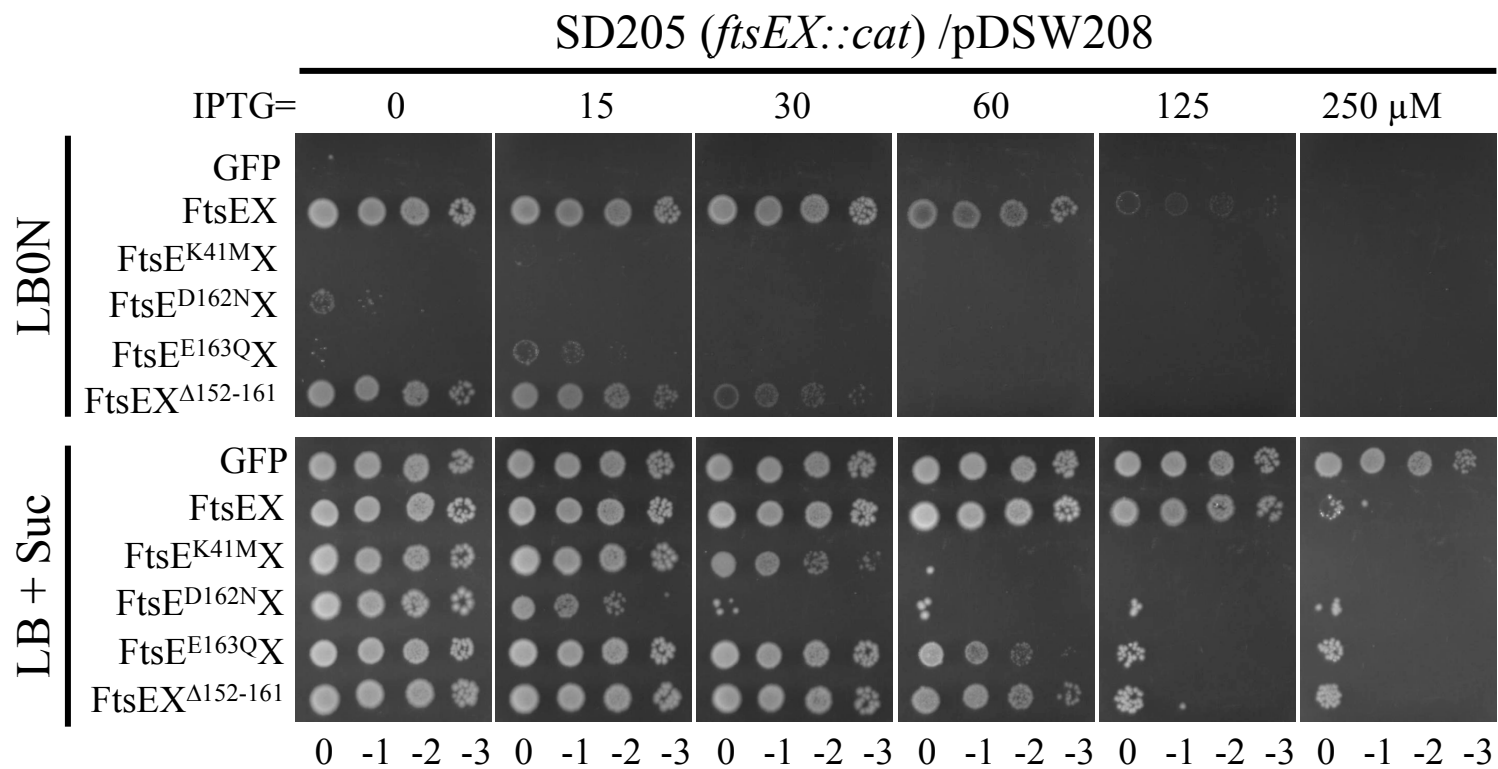



Fig. S3

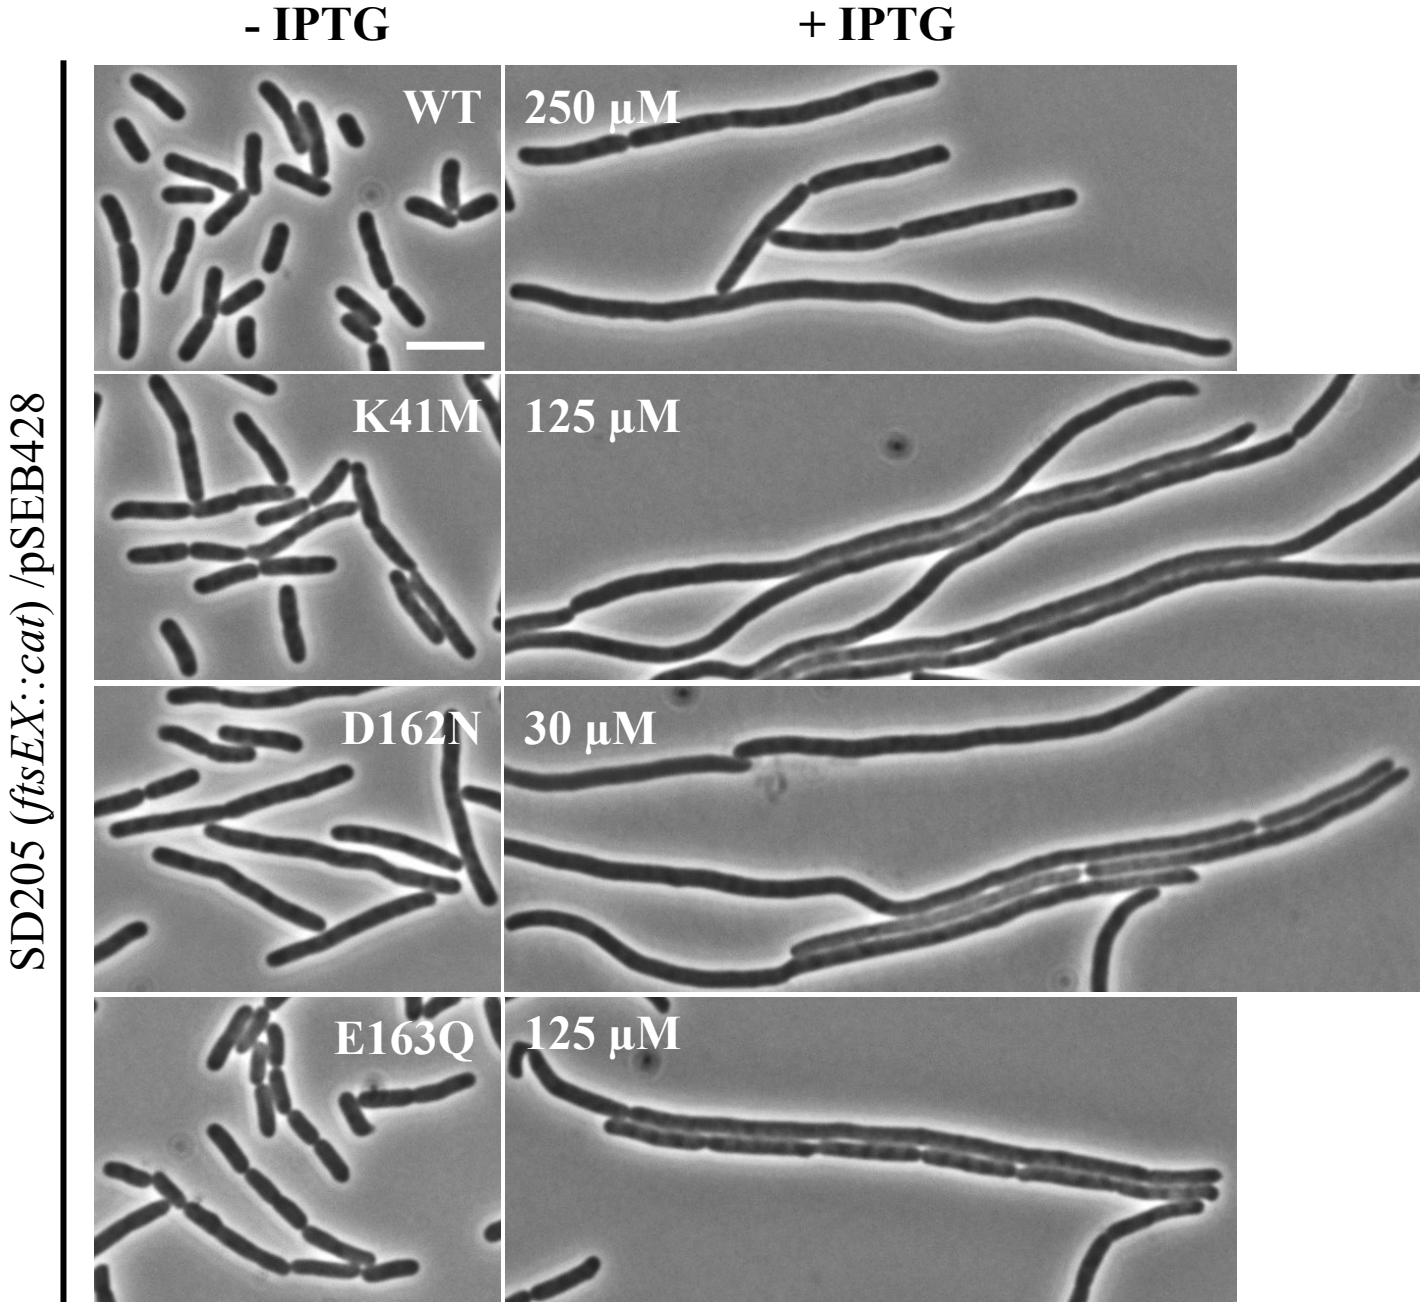

Fig. S4

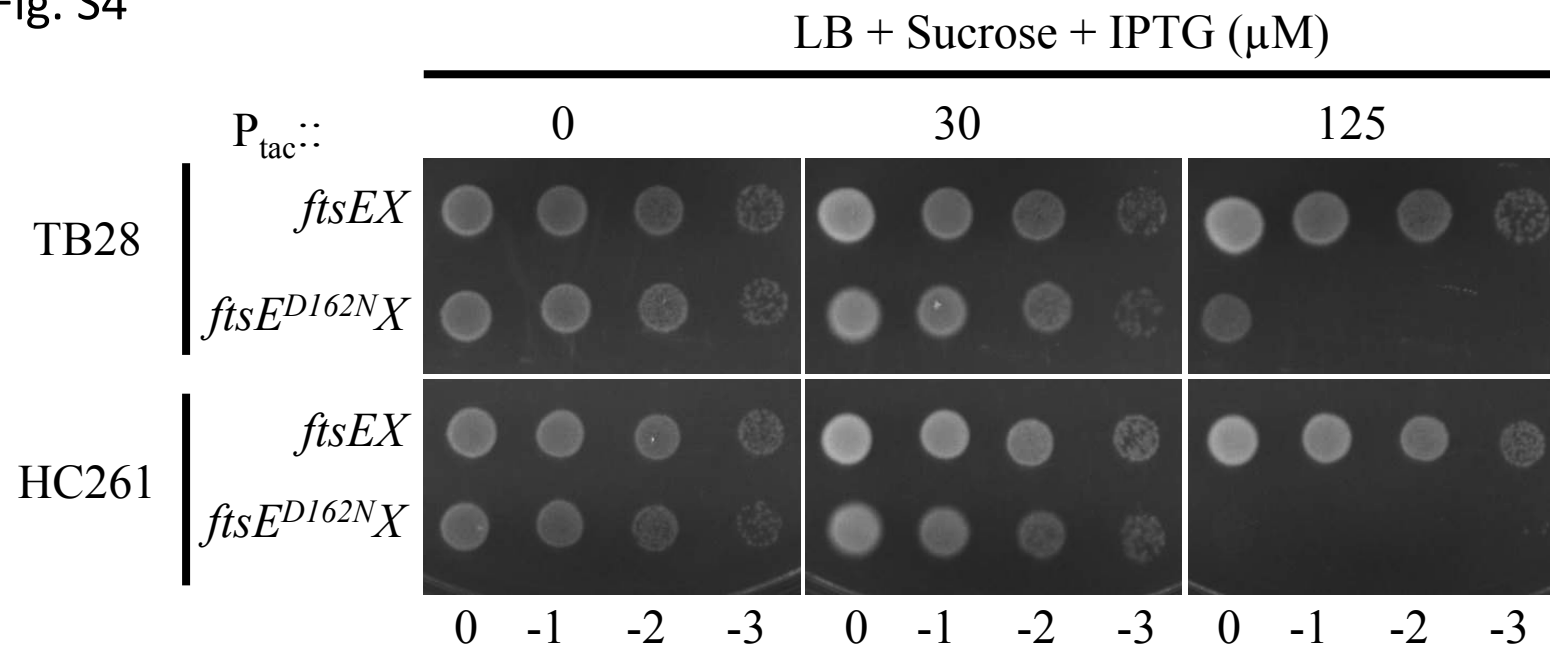

Fig. S5

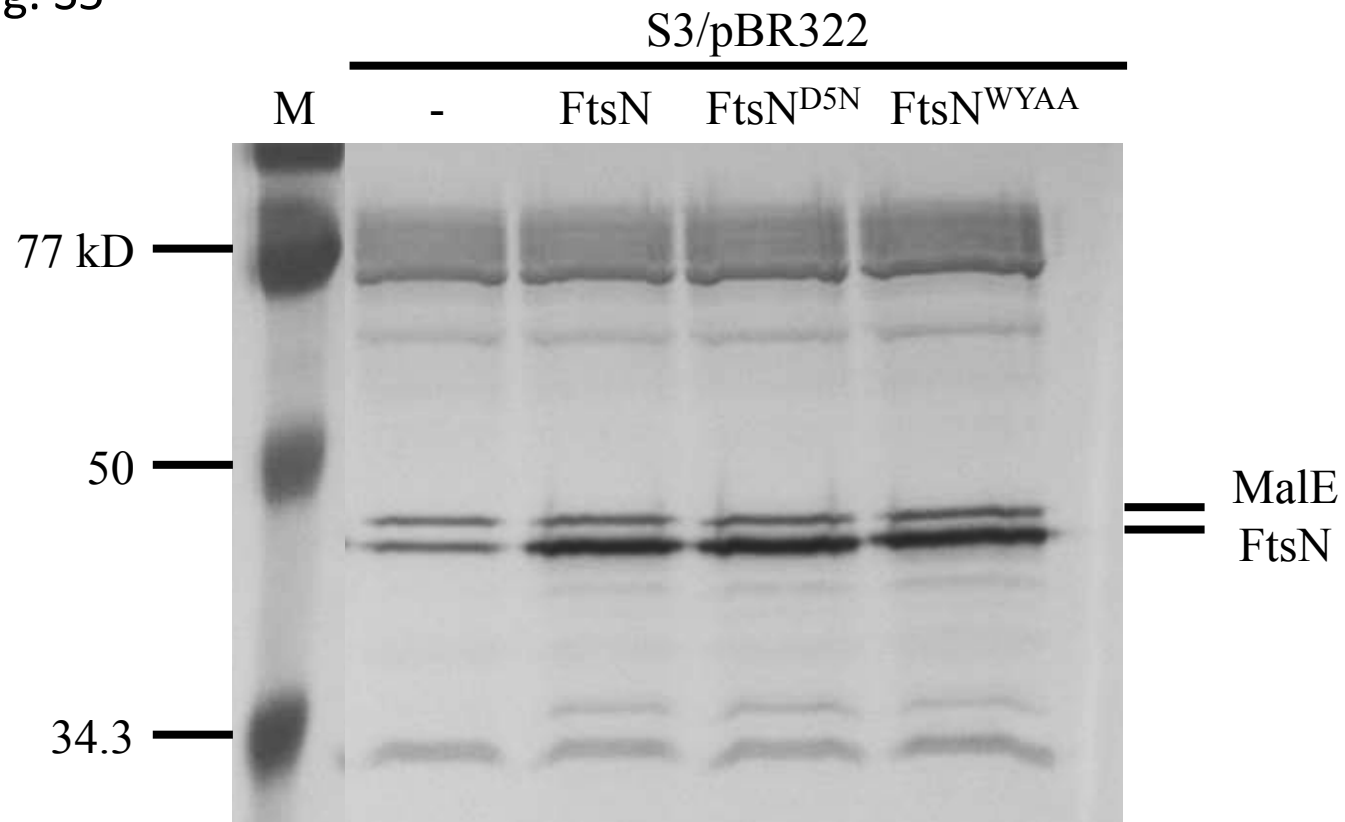

Fig. S6

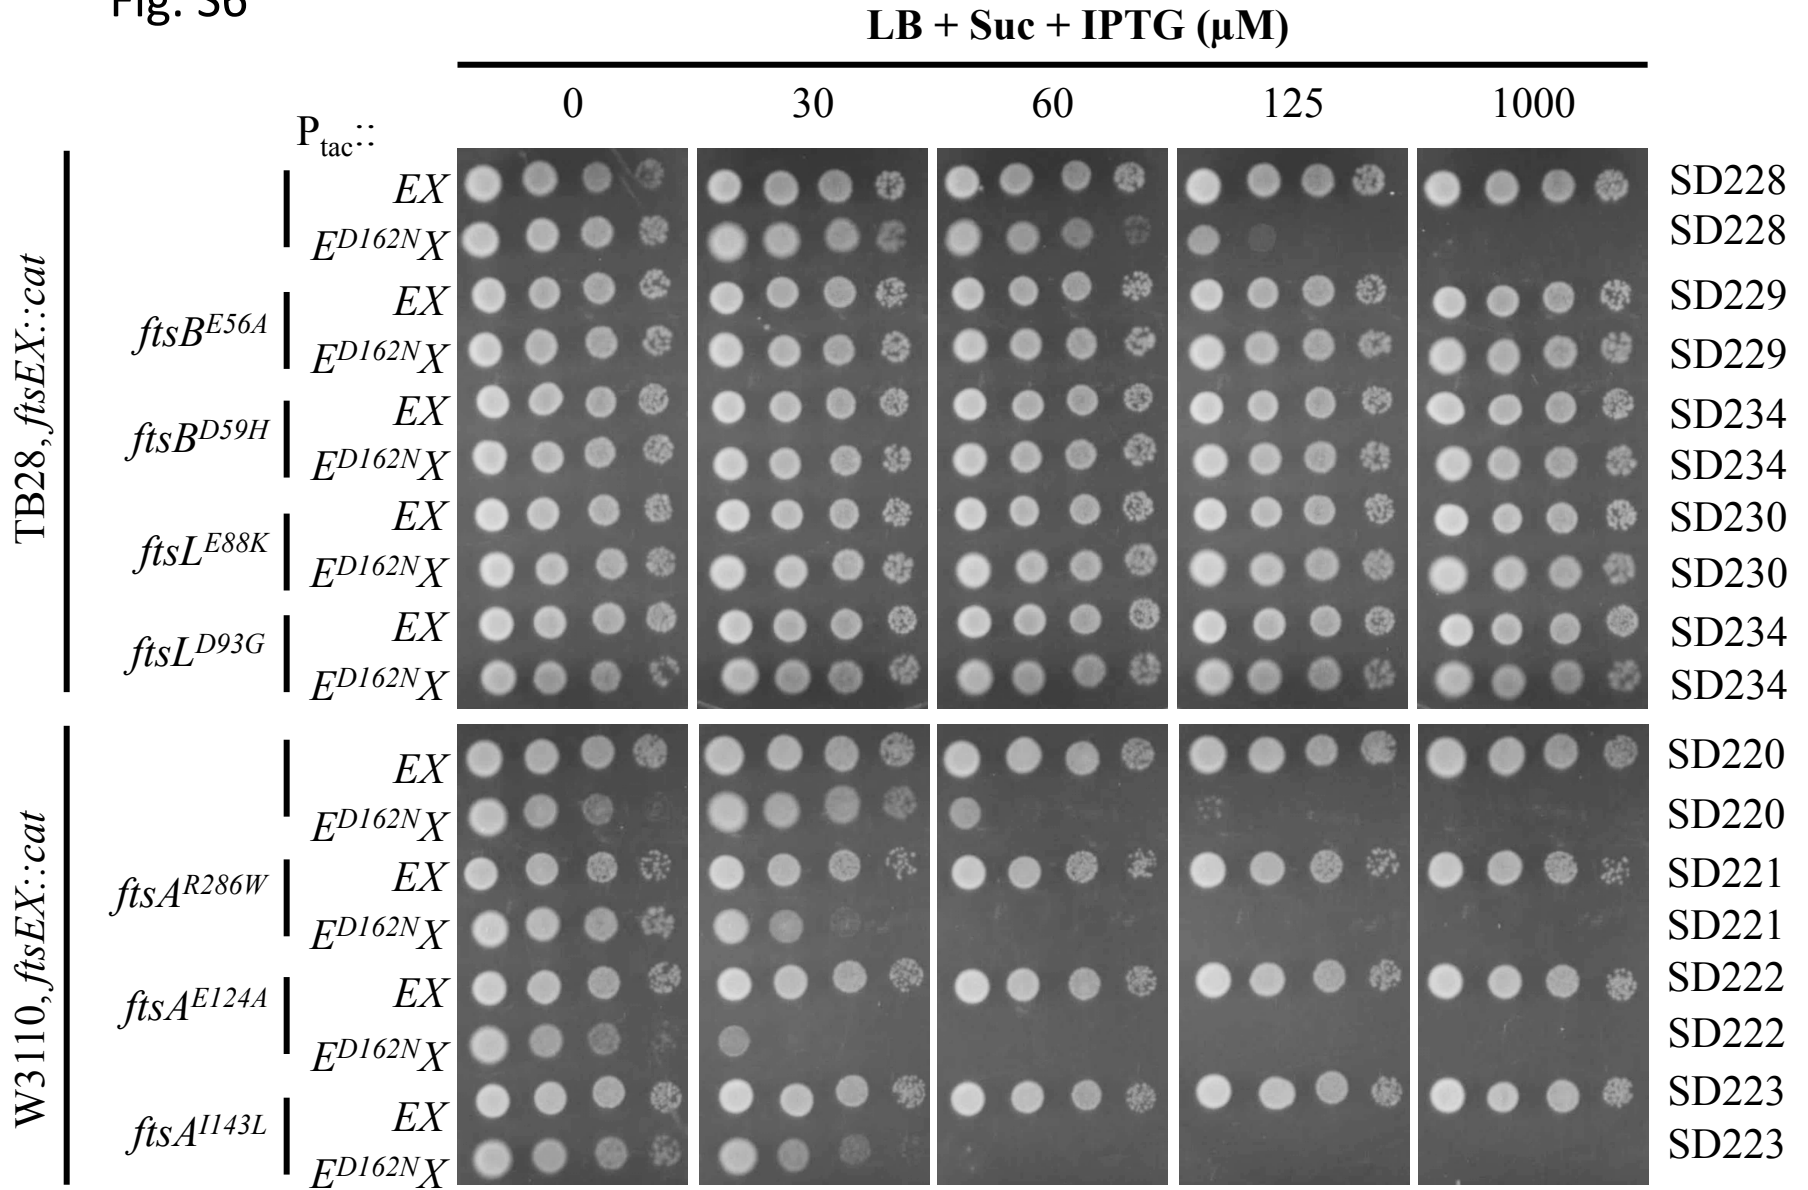

Fig. S7

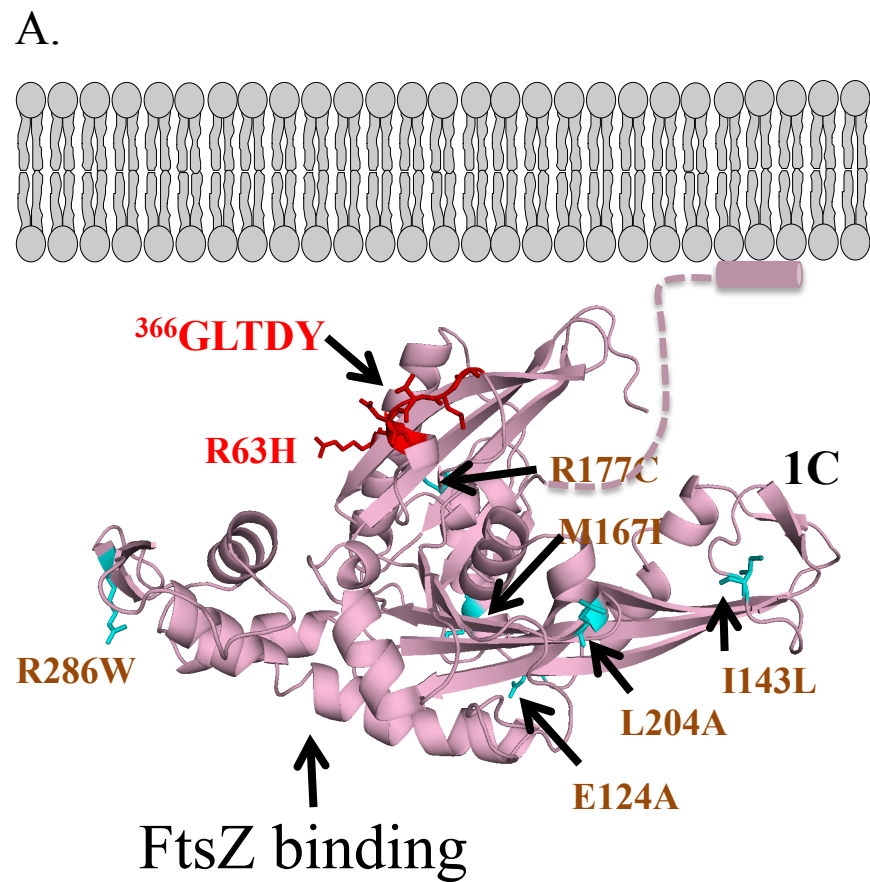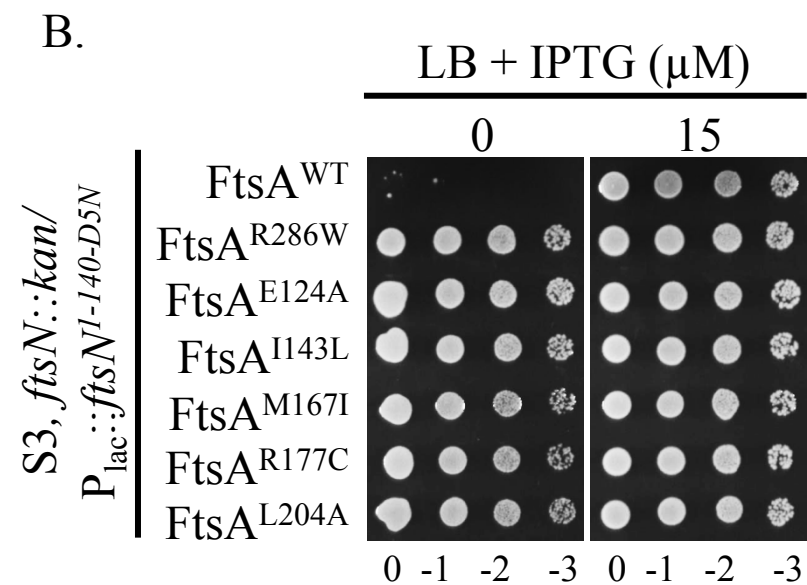

Fig. S8

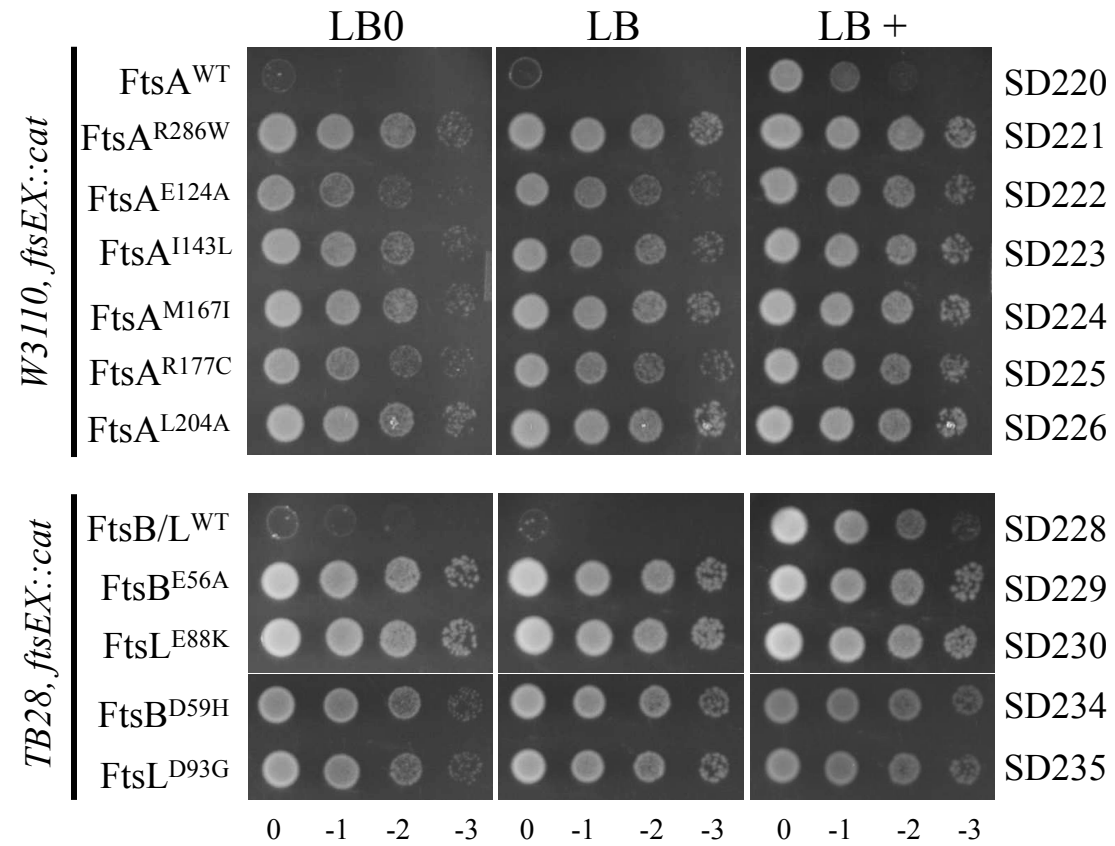



Fig. S9

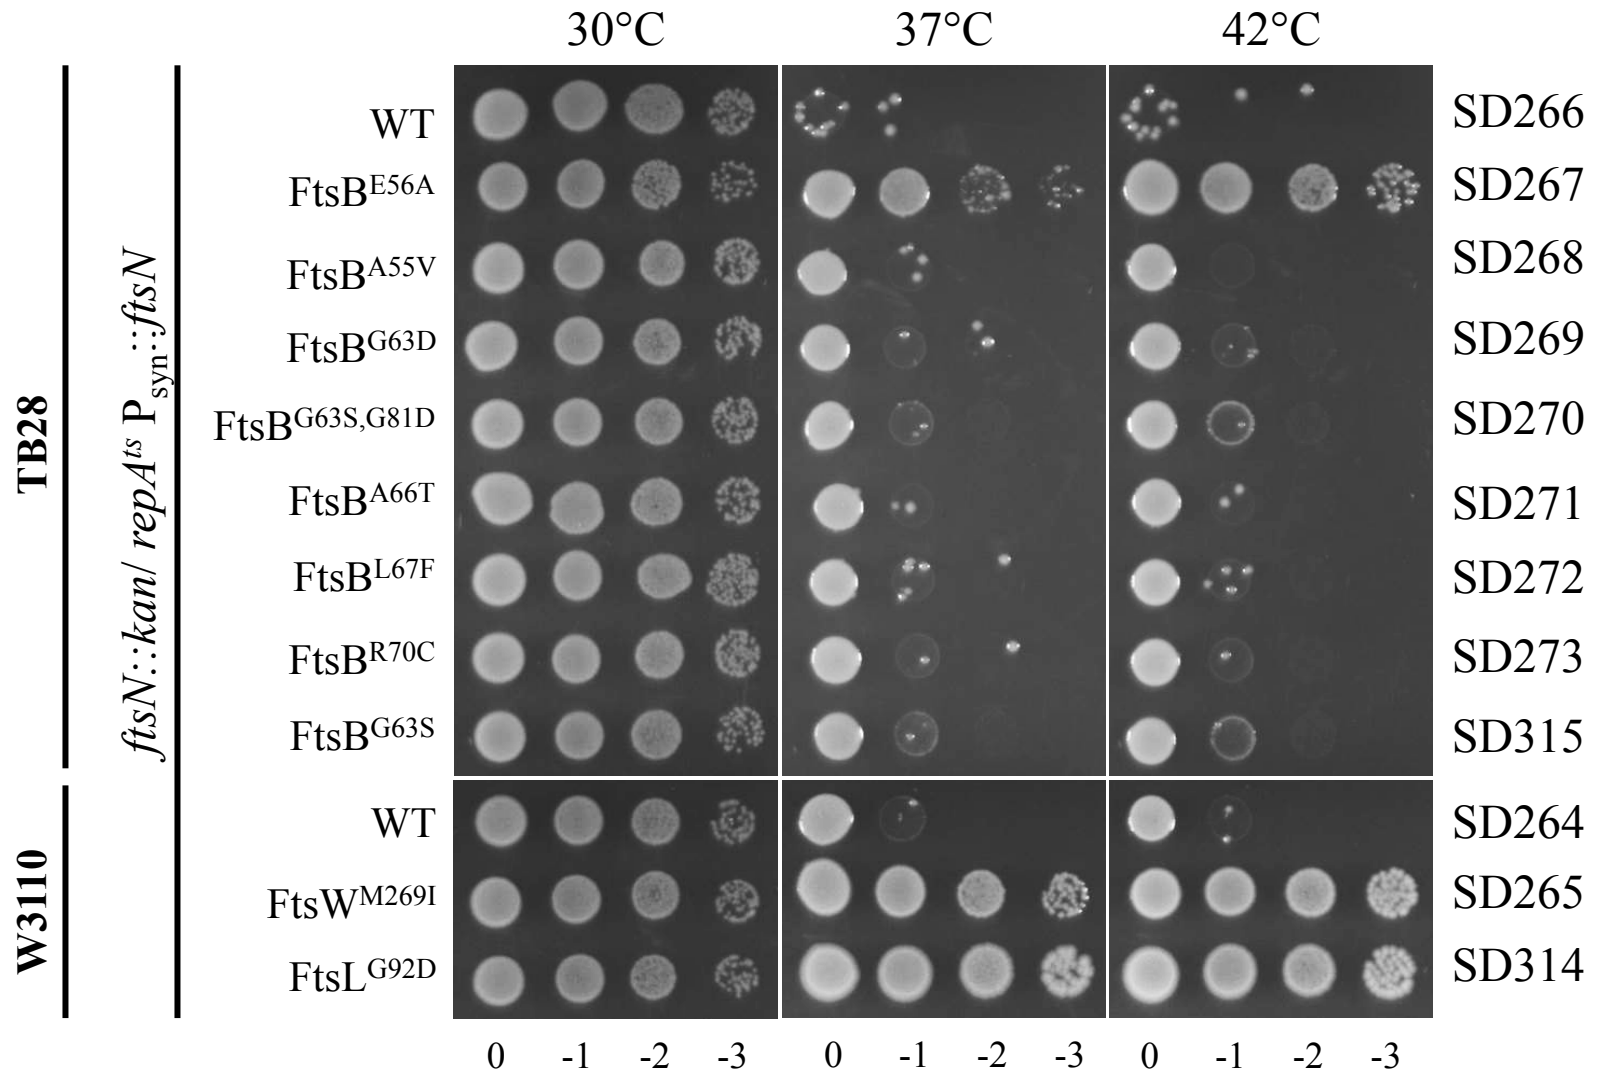

Fig. S10

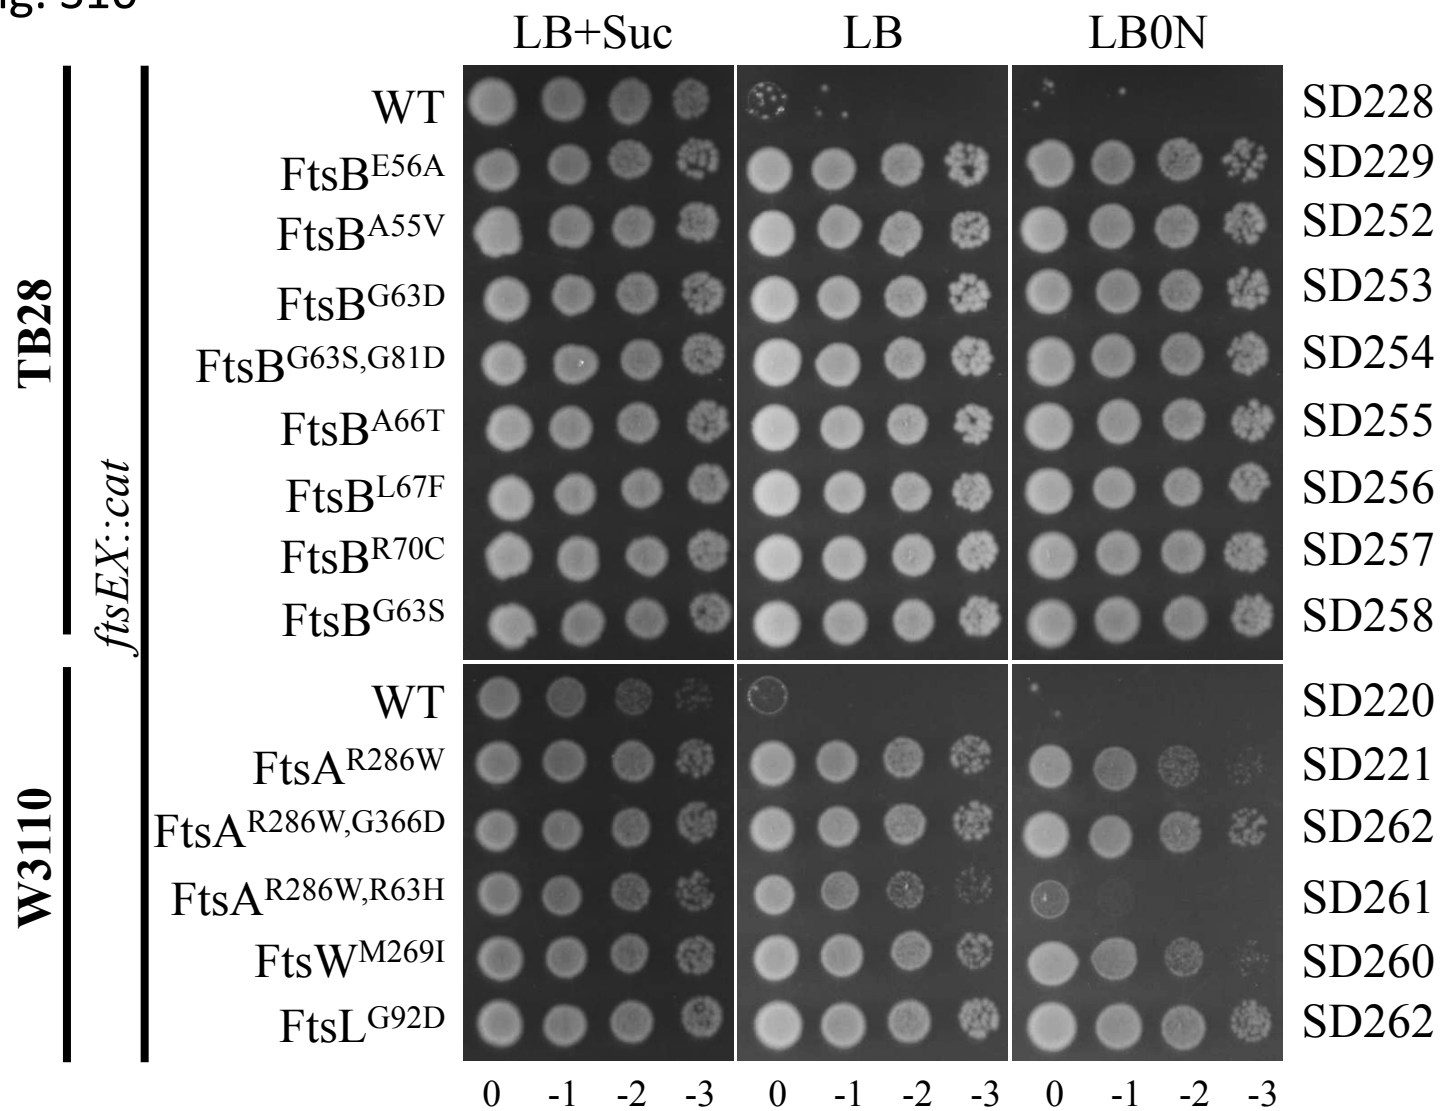

Fig. S11

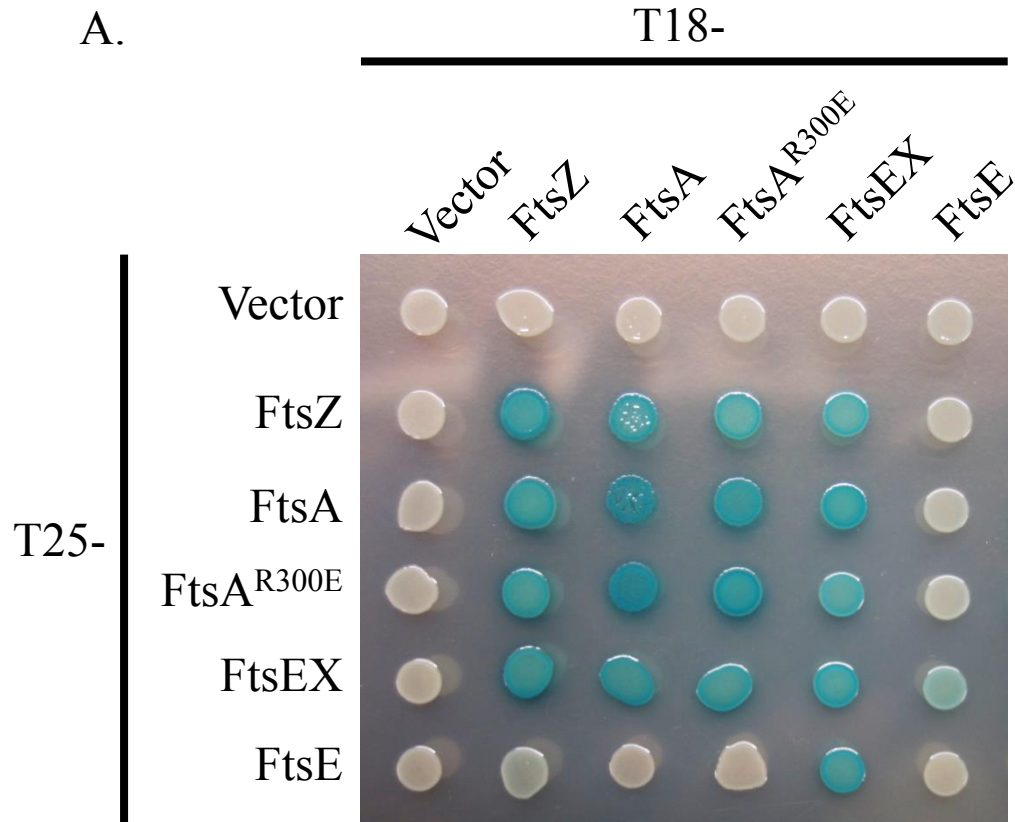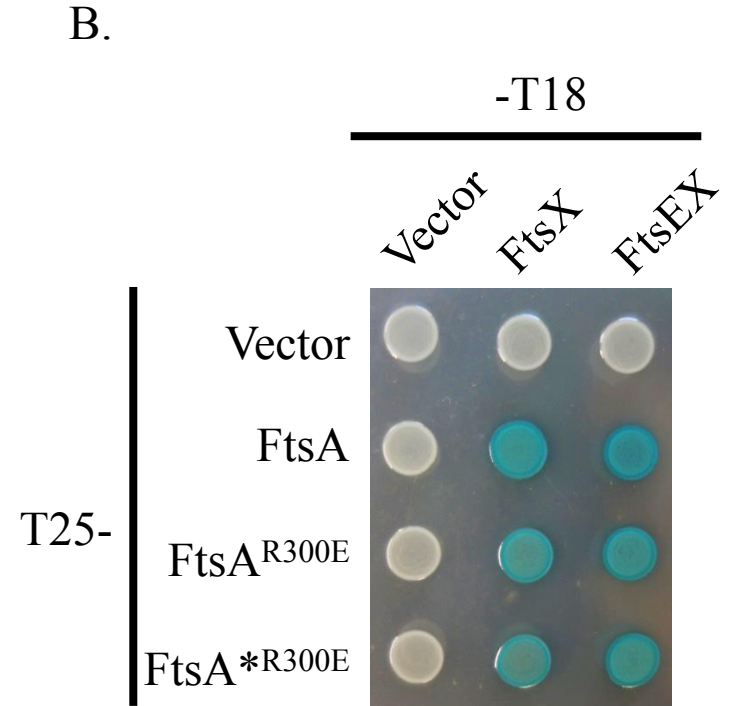

Fig. S12

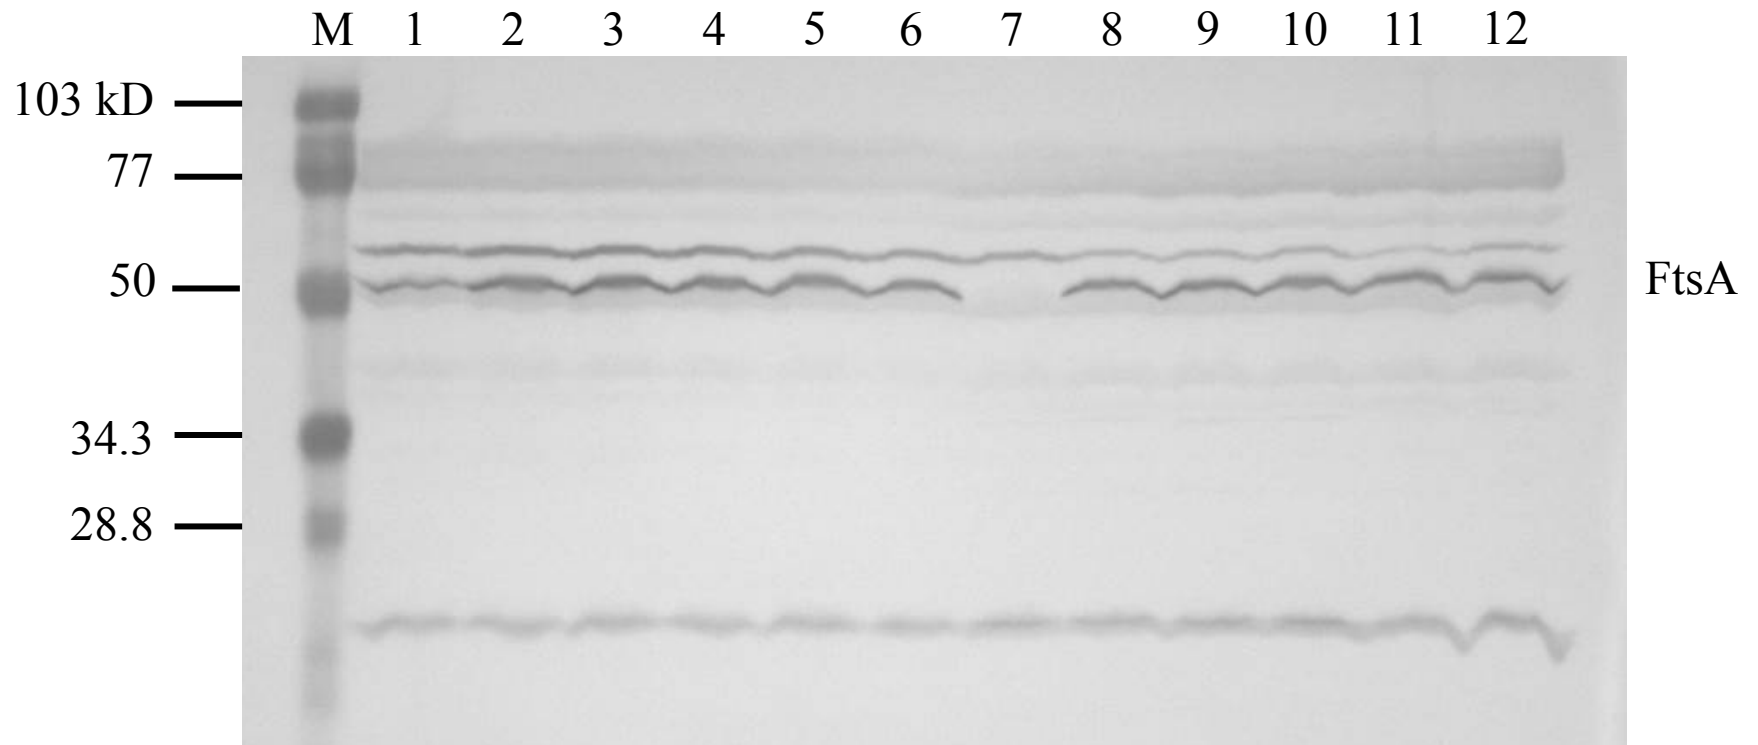

M: Marker

1&7: CH2/pDB280 (FtsA)

2&8: CH2/pDB280 & pSD266 (FtsA)

3&9: CH2/pDB280 & pSD266-R63H (FtsA<sup>R63H</sup>)

4&10: CH2/pDB280 & pSD266-G366D (FtsA<sup>G366D</sup>)

5&11: CH2/pDB280 & pSD266-L367E (FtsA<sup>L367E</sup>)

6&12: CH2/pDB280 & pSD266-D369R (FtsA<sup>D369R</sup>)

Fig. S13

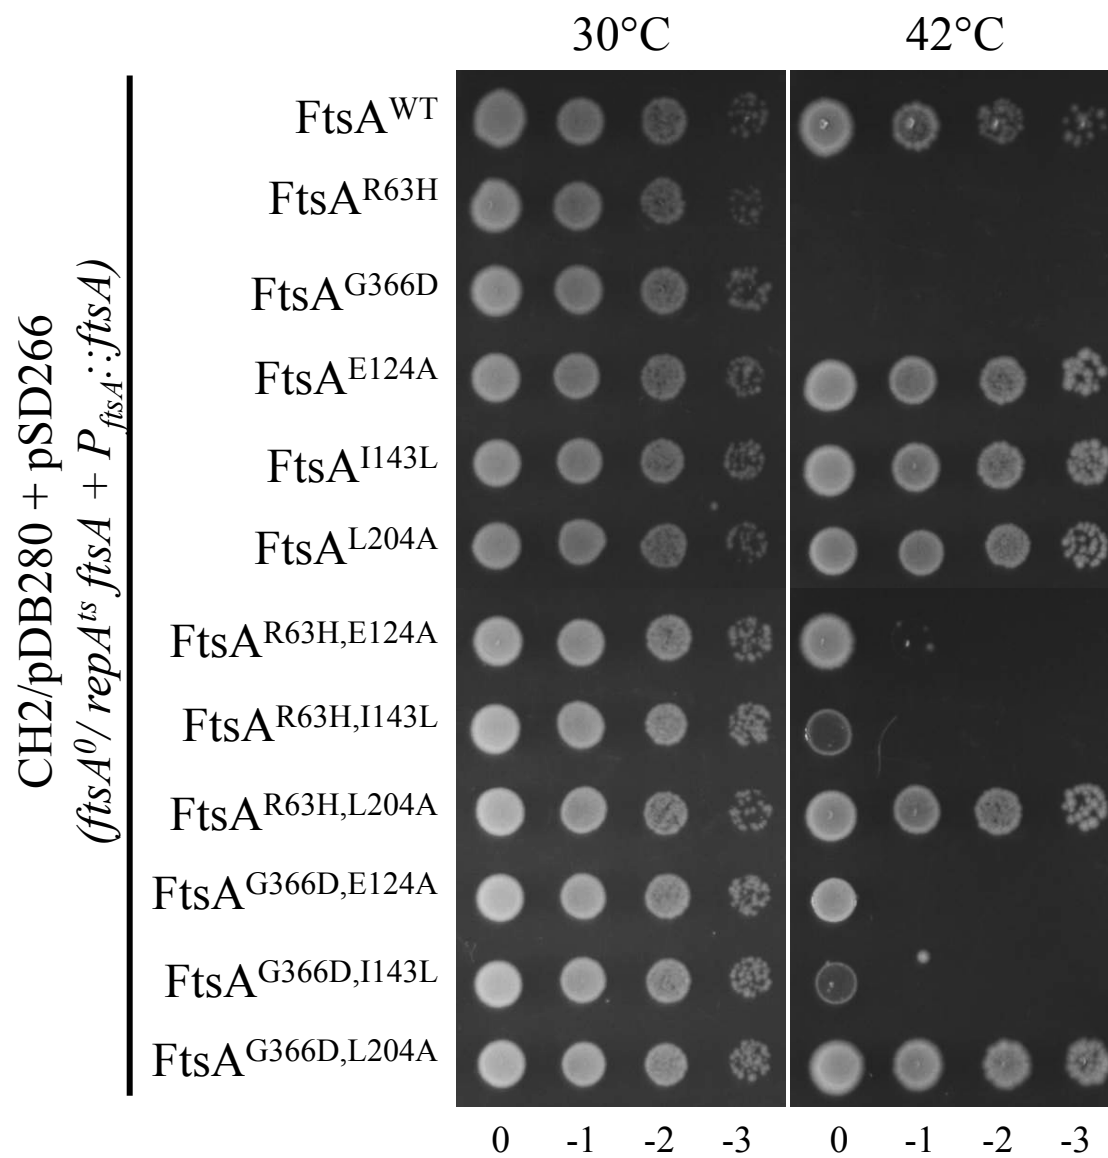



Fig. S15

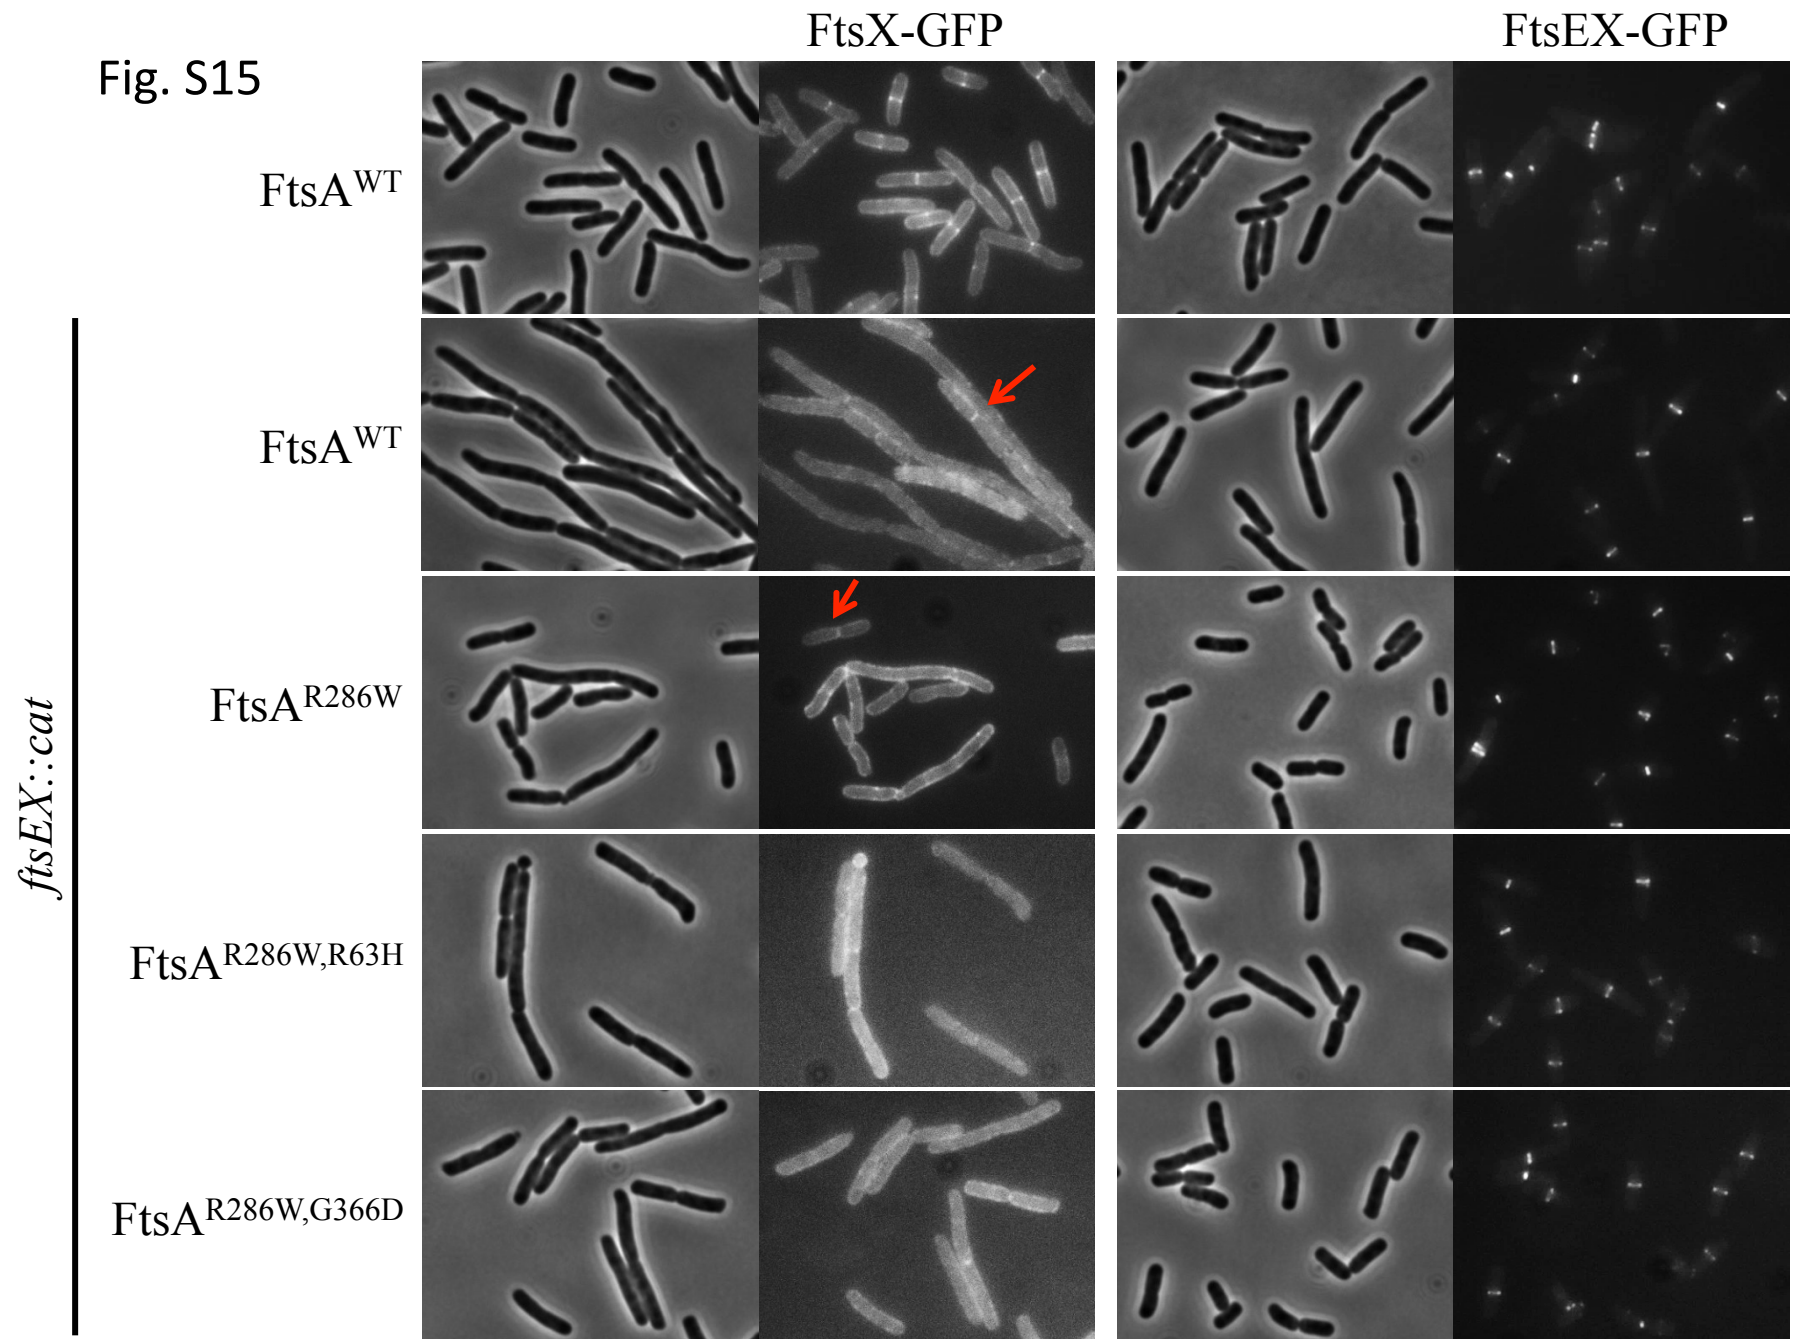

Fig. S16

CH2/pDB280 + pSD272 + pDSW311  
(*ftsA*<sup>0</sup>/*repA*<sup>ts</sup> *ftsA* + *P*<sub>*ftsA*</sub>::*ftsA* + *P*<sub>*lac*</sub>::*gfp-ftsW*)

+ Cephalexin

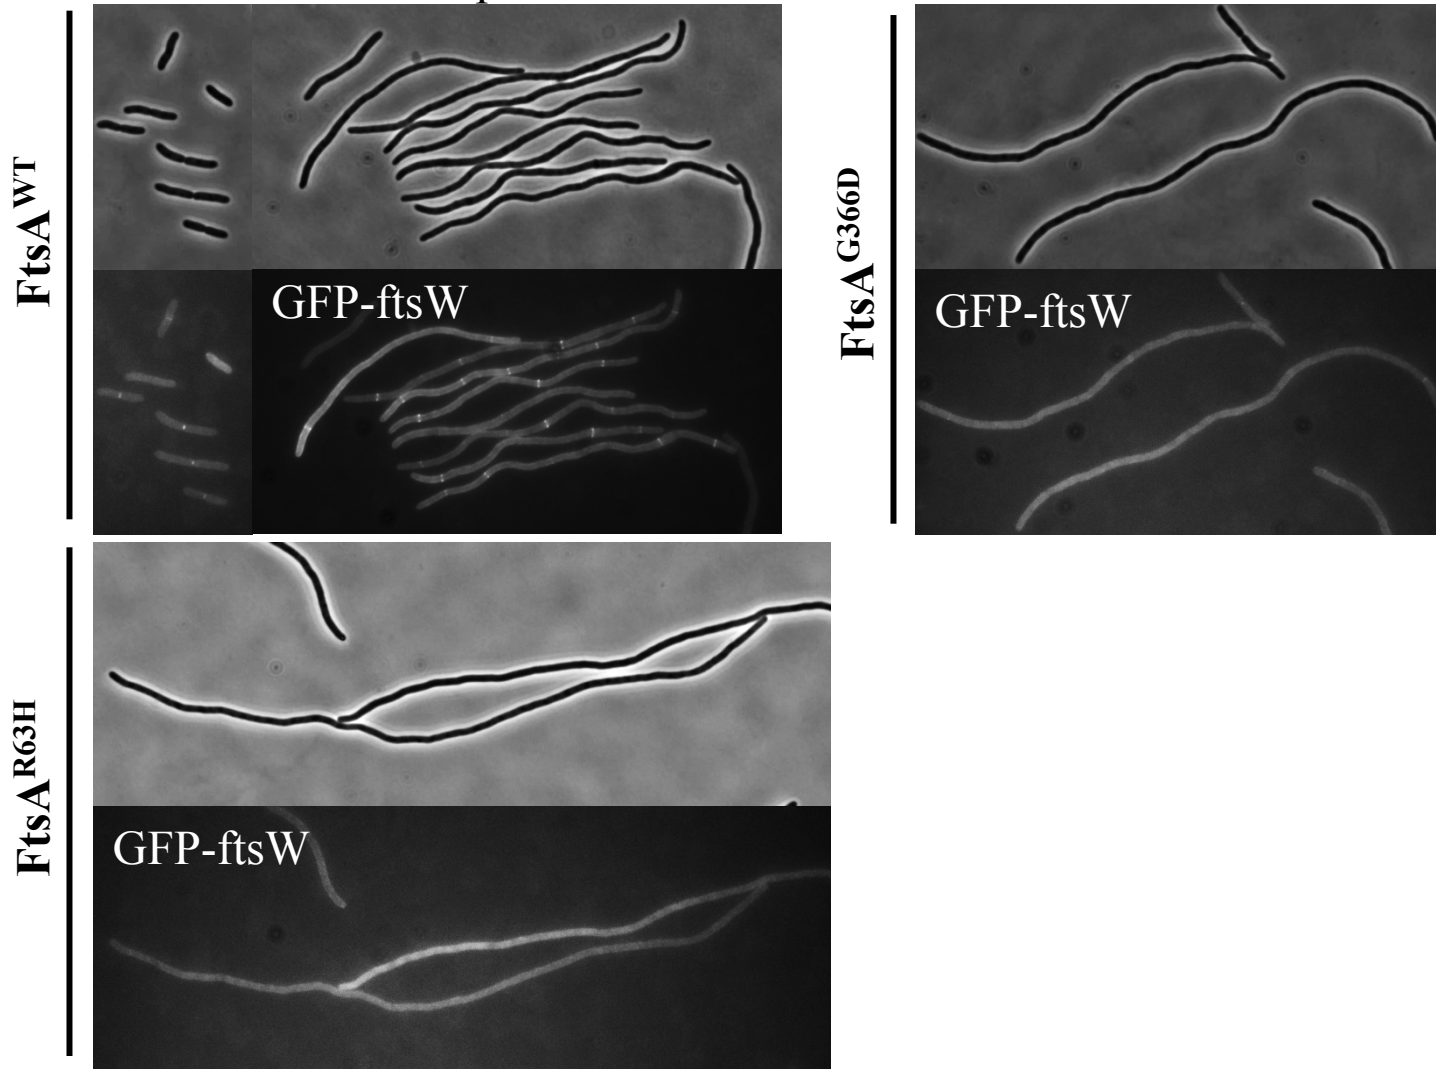



Fig. S17

CH2/pDB280 + pSD266  
(*ftsA*<sup>0</sup> / *repA*<sup>ts</sup> *ftsA* + *P*<sub>*ftsA*</sub> :: *ftsA*)

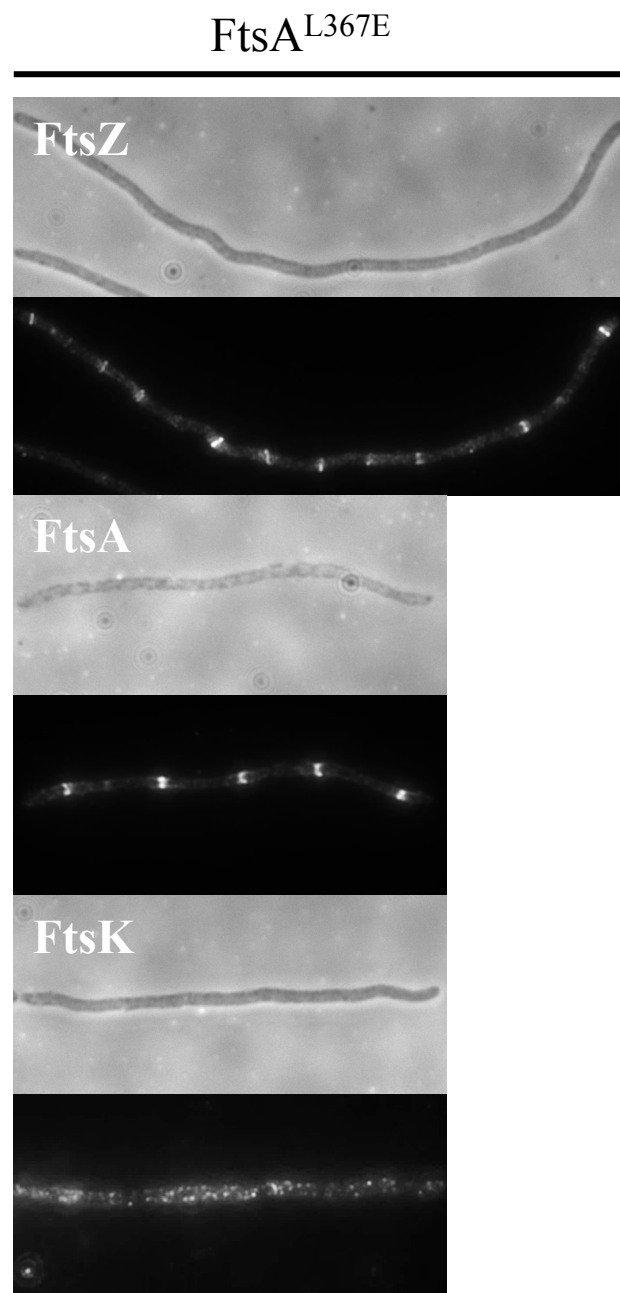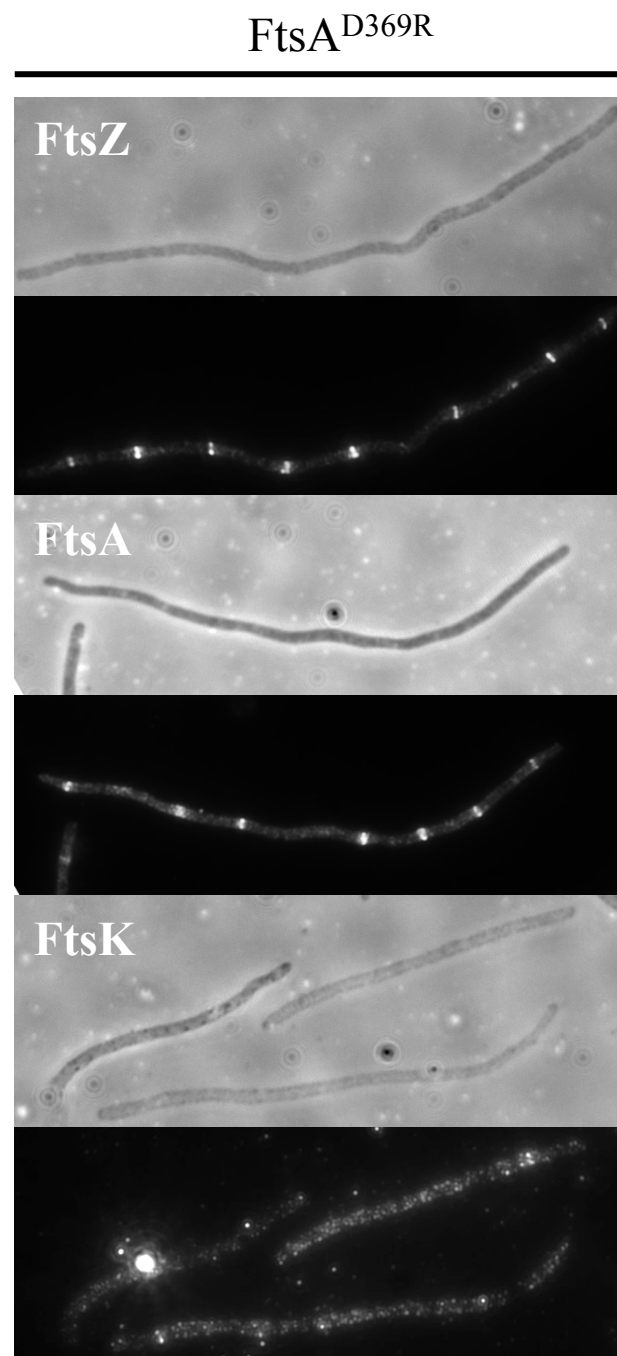

Fig. S18

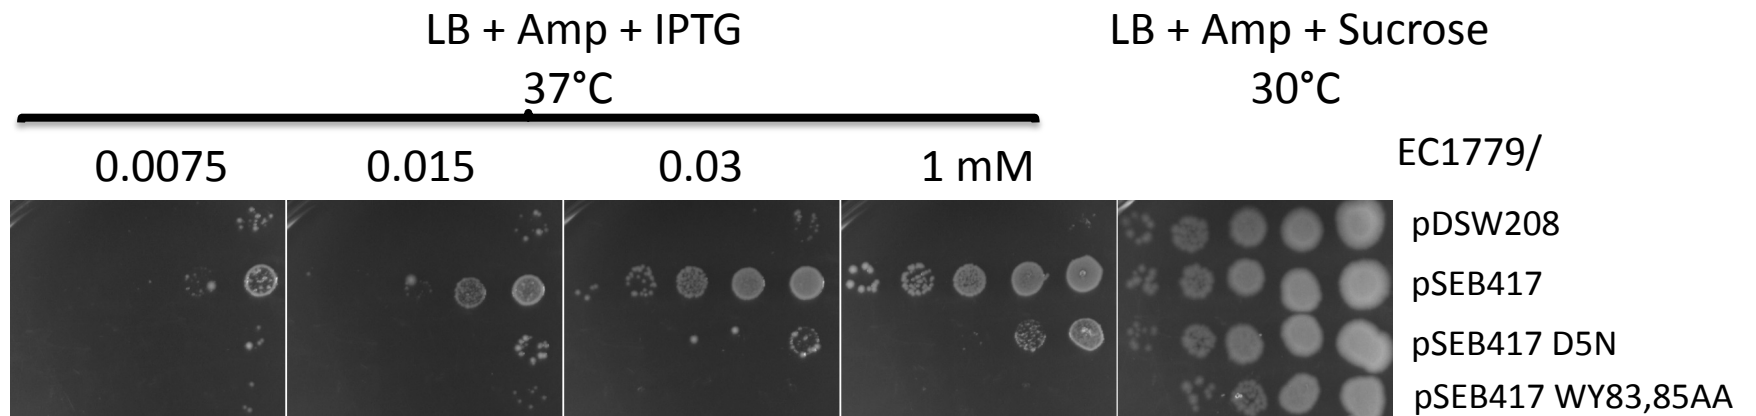

Table S1. List of mutations identified in division genes of the FtsE<sup>D162N</sup>X suppressors

| Gene        | AA substitution | Base change      | Frequency | Confirmation of resistance |
|-------------|-----------------|------------------|-----------|----------------------------|
| <i>ftsA</i> | R63H            | CGC/CAC          | 1         | Yes                        |
|             | G366D           | GGT/GAT          | 1         | Yes                        |
| <i>ftsB</i> | A55V            | GCC/GTC          | 1         | Yes                        |
|             | G63D            | GGC/GAC          | 2         | Yes                        |
|             | G63S, G81D      | GGC/AGC; GGC/GAC | 1         | Yes                        |
|             | A66T            | GCG/ACG          | 1         | Yes                        |
|             | L67F            | CTC/TTC          | 1         | Yes                        |
|             | R70C            | CGT/TGT          | 1         | Yes                        |
| <i>ftsL</i> | E88K            | GAG/AAG          | 2         | Yes                        |
|             | G92D            | GGC/GAC          | 2         | Yes                        |
|             | H94Y            | CAT/TAT          | 1         | NO                         |
| <i>ftsW</i> | M269I           | ATG/ATA          | 1         | Yes                        |

Table S2. Bacterial strains used in this study.

| Strain     | Genotype                                                              | Source/Reference    |
|------------|-----------------------------------------------------------------------|---------------------|
| BL140      | TB28, <i>ftsB</i> <sup>D59H</sup>                                     | (7)                 |
| BL154      | TB28, <i>leu::Tn10 ftsL</i> <sup>D93G</sup>                           | (7)                 |
| BL167      | TB28, <i>ftsB</i> <sup>E56A</sup>                                     | (7)                 |
| BTH101     | <i>cya-99 araD139 galE15 galK16 rpsL1 hsdR2 mcrA1</i><br><i>mcrB1</i> | (8)                 |
| CH2/pDB280 | PB103, <i>ftsA</i> <sup>0</sup> <i>recA56-srID::Tn10</i>              | (9)                 |
| EC436      | MC4100 $\Delta(\lambda attL-lom)::bla\ lacl^q P_{207}::gfp-ftsI$      | (10)                |
| EC440      | MC4100 $\Delta(\lambda attL-lom)::bla\ lacl^q P_{207}::gfp-ftsN$      | (11)                |
| EC1779     | BW25113, <i>ftsEX::cat</i>                                            | Gift from Weiss DS  |
| HC261      | TB28, <i>zapA-gfp Cam<sup>r</sup></i>                                 | (12)                |
| MT10       | TB28, <i>ftsL</i> <sup>E88K</sup>                                     | (13)                |
| PS2272     | S3, <i>ftsA</i> <sup>E124A</sup>                                      | (14)                |
| PS2273     | S3, <i>ftsA</i> <sup>I143L</sup>                                      | (14)                |
| PS2279     | S3, <i>ftsA</i> <sup>M167I</sup>                                      | (14)                |
| PS2280     | S3, <i>ftsA</i> <sup>R177C</sup>                                      | (14)                |
| PS2281     | S3, <i>ftsA</i> <sup>L204A</sup>                                      | (14)                |
| PS2343     | S3, <i>ftsA</i> <sup>R286W</sup>                                      | (14)                |
| S3         | W3110, <i>leu::Tn10</i>                                               | (15)                |
| SD205      | W3110, <i>ftsEX::cat</i>                                              | P1 (EC1779) × W3110 |
| SD220      | S3, <i>ftsEX::cat</i>                                                 | P1 (EC1779) × S3    |

|       |                                                               |                      |
|-------|---------------------------------------------------------------|----------------------|
| SD221 | S3, <i>ftsA</i> <sup>R286W</sup> <i>ftsEX::cat</i>            | P1 (EC1779) × PS2343 |
| SD222 | S3, <i>ftsA</i> <sup>E124A</sup> <i>ftsEX::cat</i>            | P1 (EC1779) × PS2272 |
| SD223 | S3, <i>ftsA</i> <sup>I143L</sup> <i>ftsEX::cat</i>            | P1 (EC1779) × PS2273 |
| SD224 | S3, <i>ftsA</i> <sup>M167I</sup> <i>ftsEX::cat</i>            | P1 (EC1779) × PS2279 |
| SD225 | S3, <i>ftsA</i> <sup>R177C</sup> <i>ftsEX::cat</i>            | P1 (EC1779) × PS2280 |
| SD226 | S3, <i>ftsA</i> <sup>L204A</sup> <i>ftsEX::cat</i>            | P1 (EC1779) × PS2281 |
| SD228 | TB28, <i>ftsEX::cat</i>                                       | P1 (EC1779) × TB28   |
| SD229 | TB28, <i>ftsB</i> <sup>E56A</sup> <i>ftsEX::cat</i>           | P1 (EC1779) × BL167  |
| SD230 | TB28, <i>ftsL</i> <sup>E88K</sup> <i>ftsEX::cat</i>           | P1 (EC1779) × MT10   |
| SD234 | TB28, <i>ftsB</i> <sup>D59H</sup> <i>ftsEX::cat</i>           | P1 (EC1779) × W3110  |
| SD235 | TB28, <i>leu::Tn10 ftsL</i> <sup>D93G</sup> <i>ftsEX::cat</i> | P1 (EC1779) × BL140  |
| SD238 | TB28, <i>ftsB</i> <sup>A55V</sup>                             | Allelic replacement  |
| SD239 | TB28, <i>ftsB</i> <sup>G63D</sup>                             | Allelic replacement  |
| SD240 | TB28, <i>ftsB</i> <sup>G63S,G81D</sup>                        | Allelic replacement  |
| SD241 | TB28, <i>ftsB</i> <sup>A66T</sup>                             | Allelic replacement  |
| SD242 | TB28, <i>ftsB</i> <sup>L67F</sup>                             | Allelic replacement  |
| SD243 | TB28, <i>ftsB</i> <sup>R70C</sup>                             | Allelic replacement  |
| SD244 | TB28, <i>ftsB</i> <sup>G63S</sup>                             | Allelic replacement  |
| SD246 | S3, <i>ftsL</i> <sup>G92D</sup>                               | Allelic replacement  |
| SD247 | S3, <i>ftsW</i> <sup>M269I</sup>                              | Allelic replacement  |
| SD248 | S3, <i>ftsA</i> <sup>R63H,R286W</sup>                         | Allelic replacement  |
| SD249 | S3, <i>ftsA</i> <sup>G366D,R286W</sup>                        | Allelic replacement  |
| SD252 | TB28, <i>ftsB</i> <sup>A55V</sup> <i>ftsEX::cat</i>           | P1 (EC1779) × SD238  |

|       |                                                                |                          |
|-------|----------------------------------------------------------------|--------------------------|
| SD253 | TB28, <i>ftsB</i> <sup>G63D</sup> <i>ftsEX::cat</i>            | P1 (EC1779) × SD239      |
| SD254 | TB28, <i>ftsB</i> <sup>G63S,G81D</sup> <i>ftsEX::cat</i>       | P1 (EC1779) × SD240      |
| SD255 | TB28, <i>ftsB</i> <sup>A66T</sup> <i>ftsEX::cat</i>            | P1 (EC1779) × SD241      |
| SD256 | TB28, <i>ftsB</i> <sup>L67F</sup> <i>ftsEX::cat</i>            | P1 (EC1779) × SD242      |
| SD257 | TB28, <i>ftsB</i> <sup>R70C</sup> <i>ftsEX::cat</i>            | P1 (EC1779) × SD243      |
| SD258 | TB28, <i>ftsB</i> <sup>G63S</sup> <i>ftsEX::cat</i>            | P1 (EC1779) × SD244      |
| SD260 | S3, <i>ftsW</i> <sup>M269I</sup> <i>ftsEX::cat</i>             | P1 (EC1779) × SD247      |
| SD261 | S3, <i>ftsA</i> <sup>R63H,R286W</sup> <i>ftsEX::cat</i>        | P1 (EC1779) × SD248      |
| SD262 | S3, <i>ftsA</i> <sup>G366D,R286W</sup> <i>ftsEX::cat</i>       | P1 (EC1779) × SD249      |
| SD263 | S3, <i>ftsL</i> <sup>G92D</sup> <i>ftsEX::cat</i>              | P1 (EC1779) × SD246      |
| SD264 | S3, <i>ftsN::kan/pBL154</i>                                    | P1 (CH34) × S3/pBL154    |
| SD265 | S3, <i>ftsW</i> <sup>M269I</sup> <i>ftsN::kan/pBL154</i>       | P1 (CH34) × SD247/pBL154 |
| SD266 | TB28, <i>ftsN::kan/pBL154</i>                                  | P1 (CH34) × TB28/pBL154  |
| SD267 | TB28, <i>ftsB</i> <sup>E56A</sup> <i>ftsN::kan/pBL154</i>      | P1 (CH34) × BL167/pBL154 |
| SD268 | TB28, <i>ftsB</i> <sup>A55V</sup> <i>ftsN::kan/pBL154</i>      | P1 (CH34) × SD238/pBL154 |
| SD269 | TB28, <i>ftsB</i> <sup>G63D</sup> <i>ftsN::kan/pBL154</i>      | P1 (CH34) × SD239/pBL154 |
| SD270 | TB28, <i>ftsB</i> <sup>G63S,G81D</sup> <i>ftsN::kan/pBL154</i> | P1 (CH34) × SD240/pBL154 |
| SD271 | TB28, <i>ftsB</i> <sup>A66T</sup> <i>ftsN::kan/pBL154</i>      | P1 (CH34) × SD241/pBL154 |
| SD272 | TB28, <i>ftsB</i> <sup>L67F</sup> <i>ftsN::kan/pBL154</i>      | P1 (CH34) × SD242/pBL154 |
| SD273 | TB28, <i>ftsB</i> <sup>R70C</sup> <i>ftsN::kan/pBL154</i>      | P1 (CH34) × SD243/pBL154 |
| SD274 | S3, <i>ftsN::kan/pMG20</i>                                     | P1 (CH34) × S3/pMG20     |
| SD275 | S3, <i>ftsW</i> <sup>M269I</sup> <i>ftsN::kan/pMG20</i>        | P1 (CH34) × SD247/pMG20  |
| SD276 | TB28, <i>ftsN::kan/pMG20</i>                                   | P1 (CH34) × TB28/pMG20   |

|       |                                                                                             |                           |
|-------|---------------------------------------------------------------------------------------------|---------------------------|
| SD277 | TB28, <i>ftsB</i> <sup>E56A</sup> <i>ftsN::kan</i> /pMG20                                   | P1 (CH34) × BL167/pMG20   |
| SD278 | TB28, <i>ftsB</i> <sup>A55V</sup> <i>ftsN::kan</i> /pMG20                                   | P1 (CH34) × SD238/pMG20   |
| SD279 | TB28, <i>ftsB</i> <sup>G63D</sup> <i>ftsN::kan</i> /pMG20                                   | P1 (CH34) × SD239/pMG20   |
| SD280 | TB28, <i>ftsB</i> <sup>G63S,G81D</sup> <i>ftsN::kan</i> /pMG20                              | P1 (CH34) × SD240/pMG20   |
| SD281 | TB28, <i>ftsB</i> <sup>A66T</sup> <i>ftsN::kan</i> /pMG20                                   | P1 (CH34) × SD241/pMG20   |
| SD282 | TB28, <i>ftsB</i> <sup>L67F</sup> <i>ftsN::kan</i> /pMG20                                   | P1 (CH34) × SD242/pMG20   |
| SD283 | TB28, <i>ftsB</i> <sup>R70C</sup> <i>ftsN::kan</i> /pMG20                                   | P1 (CH34) × SD243/pMG20   |
| SD290 | W3110, <i>ftsA</i> <sup>0</sup> /pSD263                                                     | P1 (CH2) × S3/pSD263      |
| SD296 | S3, <i>ftsA</i> <sup>0</sup> /pSD263                                                        | P1 (S3) × SD290           |
| SD303 | TB28, <i>ftsN::kan</i> /pSEB413                                                             | P1 (CH34) × TB28/pSEB413  |
| SD314 | S3, <i>ftsL</i> <sup>G92D</sup> <i>ftsN::kan</i> /pBL154                                    | P1 (CH34) × SD246/pBL154  |
| SD315 | TB28, <i>ftsB</i> <sup>G63S</sup> <i>ftsN::kan</i> /pBL154                                  | P1 (CH34) × SD244/pBL154  |
| SD316 | S3, <i>ftsL</i> <sup>G92D</sup> <i>ftsN::kan</i> /pMG20                                     | P1 (CH34) × SD246/pMG20   |
| SD317 | TB28, <i>ftsB</i> <sup>G63S</sup> <i>ftsN::kan</i> /pMG20                                   | P1 (CH34) × SD244/pMG20   |
| SD318 | TB28, <i>leu::Tn10 ftsA</i> <sup>0</sup> /pDB280                                            | P1 (SD296) × TB28/pDB280  |
| SD319 | TB28, <i>leu::Tn10 ftsA</i> <sup>0</sup> <i>ftsB</i> <sup>E56A</sup> /pDB280                | P1 (SD296) × BL167/pDB280 |
| SD320 | TB28, <i>leu::Tn10 ftsA</i> <sup>0</sup> <i>ftsB</i> <sup>D59H</sup> /pDB280                | P1 (SD296) × BL140/pDB280 |
| SD321 | TB28, <i>ftsA</i> <sup>0</sup> /pDB280                                                      | P1 (SD303) × SD318        |
| SD322 | TB28, <i>ftsA</i> <sup>0</sup> <i>ftsB</i> <sup>E56A</sup> /pDB280                          | P1 (SD303) × SD319        |
| SD323 | TB28, <i>ftsA</i> <sup>0</sup> <i>ftsB</i> <sup>D59H</sup> /pDB280                          | P1 (SD303) × SD320        |
| SD324 | TB28, <i>ftsA</i> <sup>0</sup> <i>recA56-srlD::Tn10</i> /pDB280                             | P1 (CH2) × SD321          |
| SD325 | TB28, <i>ftsA</i> <sup>0</sup> <i>ftsB</i> <sup>E56A</sup> <i>recA56-srlD::Tn10</i> /pDB280 | P1 (CH2) × SD322          |
| SD326 | TB28, <i>ftsA</i> <sup>0</sup> <i>ftsB</i> <sup>D59H</sup> <i>recA56-srlD::Tn10</i> /pDB280 | P1 (CH2) × SD323          |

|       |                                                      |                                 |
|-------|------------------------------------------------------|---------------------------------|
| SD327 | S3, <i>ftsN::kan/pSEB414-D5N</i>                     | P1 (SD303) × S3/pSEB414-D5N     |
| SD328 | S3, <i>ftsA<sup>E124A</sup>ftsN::kan/pSEB414-D5N</i> | P1 (SD303) × PS2272/pSEB414-D5N |
| SD329 | S3, <i>ftsA<sup>I143L</sup>ftsN::kan/pSEB414-D5N</i> | P1 (SD303) × PS2273/pSEB414-D5N |
| SD330 | S3, <i>ftsA<sup>M167I</sup>ftsN::kan/pSEB414-D5N</i> | P1 (SD303) × PS2279/pSEB414-D5N |
| SD331 | S3, <i>ftsA<sup>R177C</sup>ftsN::kan/pSEB414-D5N</i> | P1 (SD303) × PS2280/pSEB414-D5N |
| SD332 | S3, <i>ftsA<sup>L204A</sup>ftsN::kan/pSEB414-D5N</i> | P1 (SD303) × PS2281/pSEB414-D5N |
| SD333 | S3, <i>ftsA<sup>R286W</sup>ftsN::kan/pSEB414-D5N</i> | P1 (SD303) × PS2343/pSEB414-D5N |
| TB28  | MG1655, <i>lacIZYA&lt;&gt;frt</i>                    | (16)                            |



Table S3. Plasmid used in this study.

| Plasmid       | Genotype                                                                                                 | Source/ Reference |
|---------------|----------------------------------------------------------------------------------------------------------|-------------------|
| pBANG100      | pACYC184, <i>ftsZ<sup>+</sup></i> , <i>Kan<sup>r</sup></i>                                               | Bang Shen         |
| pBANG112      | pACYC184, <i>ftsZ<sup>+</sup></i> , <i>Amp<sup>r</sup></i>                                               | (17)              |
| pBL154        | pSC101 <sup>ts</sup> , P <sub>syn</sub> :: <i>ftsN</i> , <i>Spc<sup>r</sup></i>                          | (7)               |
| pBR322        | pMB1, <i>Amp<sup>r</sup></i>                                                                             | Lab collection    |
| pDB280        | pSC101 <sup>ts</sup> , <i>ftsA<sup>+</sup></i> , <i>Cam<sup>r</sup></i>                                  | (9)               |
| pDSW208       | pDSW204-MCS- <i>gfp</i> , <i>Amp<sup>r</sup></i>                                                         | (10)              |
| pDSW209       | pDSW206- <i>gfp</i> -MCS, <i>Amp<sup>r</sup></i>                                                         | (10)              |
| pDSW210       | pDSW206-MCS- <i>gfp</i> , <i>Amp<sup>r</sup></i>                                                         | (10)              |
| pDSW311       | pDSW209, P <sub>206</sub> :: <i>gfp-ftsW</i> , <i>Amp<sup>r</sup></i>                                    | (18)              |
| pDSW610       | pBAD33, P <sub>BAD</sub> :: <i>ftsEX</i> , <i>Cam<sup>r</sup></i>                                        | (19)              |
| pDSW610-D162N | pBAD33, P <sub>BAD</sub> :: <i>ftsE<sup>D162N</sup>X</i> , <i>Cam<sup>r</sup></i>                        | This study        |
| pEXT22        | <i>ori</i> (R100) P <sub>tac</sub> ::, <i>Kan<sup>r</sup></i>                                            | (20)              |
| pEX-T18       | pUT18, P <sub>lac</sub> :: <i>ftsEX-T18</i> , <i>Amp<sup>r</sup></i>                                     | This study        |
| pKD46         | pSC101 <sup>ts</sup> , P <sub>BAD</sub> :: <i>exo</i> , <i>bet</i> , <i>gam</i> , <i>Kan<sup>r</sup></i> | (5)               |
| pKD140        | pBR322, <i>ftsN<sup>+</sup></i> , <i>Amp<sup>r</sup></i>                                                 | (21)              |
| pKD140-D5N    | pBR322, <i>ftsN<sup>D5N</sup></i> , <i>Amp<sup>r</sup></i>                                               | (22)              |
| pKD140-WYAA   | pBR322, <i>ftsN<sup>W83A,Y85A</sup></i> , <i>Amp<sup>r</sup></i>                                         | This study        |
| pKT25         | pACYC184, P <sub>lac</sub> ::T25-, <i>Kan<sup>r</sup></i>                                                | (8)               |
| pKT25-E       | pACYC184, P <sub>lac</sub> ::T25- <i>ftsE</i> , <i>Kan<sup>r</sup></i>                                   | This study        |
| pKT25-EX      | pACYC184, P <sub>lac</sub> ::T25- <i>ftsEX</i> , <i>Kan<sup>r</sup></i>                                  | This study        |

|              |                                                                                                       |            |
|--------------|-------------------------------------------------------------------------------------------------------|------------|
| pMG20        | pBAD33, P <sub>BAD</sub> :: <sup>ss</sup> <i>torA-bfp-ftsN</i> <sup>71-105</sup> - <i>le</i>          | (23)       |
| pSD221       | pEXT22, P <sub>tac</sub> :: <i>ftsEX</i> , <i>Kan</i> <sup>r</sup>                                    | This study |
| pSD221-D162N | pEXT22, P <sub>tac</sub> :: <i>ftsE</i> <sup>D162N</sup> <i>X</i> , <i>Kan</i> <sup>r</sup>           | This study |
| pSD226       | pDSW210, P <sub>206</sub> :: <i>ftsX-gfp</i> , <i>Amp</i> <sup>r</sup>                                | This study |
| pSD242       | pDSW210, P <sub>206</sub> :: <i>ftsEX-gfp</i> , <i>Amp</i> <sup>r</sup>                               | This study |
| pSD255       | pSC101 <sup>ts</sup> , P <sub>syn</sub> :: <i>ftsB</i> , <i>Spc</i> <sup>r</sup>                      | This study |
| pSD255-A55V  | pSC101 <sup>ts</sup> , P <sub>syn</sub> :: <i>ftsB</i> <sup>A55V</sup> , <i>Spc</i> <sup>r</sup>      | This study |
| pSD255-G63D  | pSC101 <sup>ts</sup> , P <sub>syn</sub> :: <i>ftsB</i> <sup>G63D</sup> , <i>Spc</i> <sup>r</sup>      | This study |
| pSD255-G&D   | pSC101 <sup>ts</sup> , P <sub>syn</sub> :: <i>ftsB</i> <sup>G63S,G81D</sup> , <i>Spc</i> <sup>r</sup> | This study |
| pSD255-G63S  | pSC101 <sup>ts</sup> , P <sub>syn</sub> :: <i>ftsB</i> <sup>G63S</sup> , <i>Spc</i> <sup>r</sup>      | This study |
| pSD255-A66T  | pSC101 <sup>ts</sup> , P <sub>syn</sub> :: <i>ftsB</i> <sup>A66T</sup> , <i>Spc</i> <sup>r</sup>      | This study |
| pSD255-L67F  | pSC101 <sup>ts</sup> , P <sub>syn</sub> :: <i>ftsB</i> <sup>L67F</sup> , <i>Spc</i> <sup>r</sup>      | This study |
| pSD255-R70C  | pSC101 <sup>ts</sup> , P <sub>syn</sub> :: <i>ftsB</i> <sup>R70C</sup> , <i>Spc</i> <sup>r</sup>      | This study |
| pSD256       | pSC101 <sup>ts</sup> , P <sub>syn</sub> :: <i>ftsL</i> , <i>Spc</i> <sup>r</sup>                      | This study |
| pSD256-G92D  | pSC101 <sup>ts</sup> , P <sub>syn</sub> :: <i>ftsL</i> <sup>G92D</sup> , <i>Spc</i> <sup>r</sup>      | This study |
| pSD257       | pSC101 <sup>ts</sup> , P <sub>syn</sub> :: <i>ftsW</i> , <i>Spc</i> <sup>r</sup>                      | This study |
| pSD257-M269I | pSC101 <sup>ts</sup> , P <sub>syn</sub> :: <i>ftsW</i> <sup>M269I</sup> , <i>Spc</i> <sup>r</sup>     | This study |
| pSD265       | pACYC184, P <sub>ftsA</sub> :: <i>ftsA</i> , <i>Amp</i> <sup>r</sup>                                  | This study |
| pSD266       | pACYC184, P <sub>ftsA</sub> :: <i>ftsA</i> , <i>Amp</i> <sup>r</sup>                                  | This study |
| pSD266*      | pACYC184, P <sub>ftsA</sub> :: <i>ftsA</i> <sup>R286W</sup> , <i>Amp</i> <sup>r</sup>                 | This study |
| pSD266-R63H  | pACYC184, P <sub>ftsA</sub> :: <i>ftsA</i> <sup>R63H</sup> , <i>Amp</i> <sup>r</sup>                  | This study |
| pSD266-G366D | pACYC184, P <sub>ftsA</sub> :: <i>ftsA</i> <sup>G366D</sup> , <i>Amp</i> <sup>r</sup>                 | This study |
| pSD266-L367E | pACYC184, P <sub>ftsA</sub> :: <i>ftsA</i> <sup>L367E</sup> , <i>Amp</i> <sup>r</sup>                 | This study |

|                                                  |                                                                                            |            |
|--------------------------------------------------|--------------------------------------------------------------------------------------------|------------|
| pSD266-D369R                                     | pACYC184, P <sub>ftsA</sub> ::ftsA <sup>D369R</sup> , Amp <sup>r</sup>                     | This study |
| pSD266*-R63H                                     | pACYC184, P <sub>ftsA</sub> ::ftsA <sup>R286W,R63H</sup> , Amp <sup>r</sup>                | This study |
| pSD266*-G366D                                    | pACYC184, P <sub>ftsA</sub> ::ftsA <sup>R286W,G366D</sup> , Amp <sup>r</sup>               | This study |
| pSD266*-L367E                                    | pACYC184, P <sub>ftsA</sub> ::ftsA <sup>R286W,L367E</sup> , Amp <sup>r</sup>               | This study |
| pSD266*-D369R                                    | pACYC184, P <sub>ftsA</sub> ::ftsA <sup>R286W,D369R</sup> , Amp <sup>r</sup>               | This study |
| pSD266-R63H&E124A                                | pACYC184, P <sub>ftsA</sub> ::ftsA <sup>R63H,E124A</sup> , Amp <sup>r</sup>                | This study |
| pSD266-R63H&I143L                                | pACYC184, P <sub>ftsQ</sub> ::ftsA <sup>R63H,I143L</sup> , Amp <sup>r</sup>                | This study |
| pSD266-R63H&L204A                                | pACYC184, P <sub>ftsA</sub> ::ftsA <sup>R63H,L204A</sup> , Amp <sup>r</sup>                | This study |
| pSD266-G366D&E124A                               | pACYC184, P <sub>ftsA</sub> ::ftsA <sup>G366D,E124A</sup> , Amp <sup>r</sup>               | This study |
| pSD266-G366D&I143L                               | pACYC184, P <sub>ftsA</sub> ::ftsA <sup>G366D,I143L</sup> , Amp <sup>r</sup>               | This study |
| pSD266-G366D&L204A                               | pACYC184, P <sub>ftsA</sub> ::ftsA <sup>G366D,L204A</sup> , Amp <sup>r</sup>               | This study |
| pSD273                                           | pACYC184, P <sub>ftsA</sub> ::ftsA, Kan <sup>r</sup>                                       | This study |
| pSD273-R63H                                      | pACYC184, P <sub>ftsA</sub> ::ftsA <sup>R63H</sup> , Kan <sup>r</sup>                      | This study |
| pSD273-G366D                                     | pACYC184, P <sub>ftsA</sub> ::ftsA <sup>G366D</sup> , Kan <sup>r</sup>                     | This study |
| pSEB428                                          | pDSW208, P <sub>204</sub> ::ftsEX, Amp <sup>r</sup>                                        | (22)       |
| pSEB413                                          | pDSW210, P <sub>206</sub> ::ftsN, Amp <sup>r</sup>                                         | (22)       |
| pSEB414-D5N                                      | pDSW210, P <sub>206</sub> ::ftsN <sup>I-140-D5N</sup> , Amp <sup>r</sup>                   | (22)       |
| pSEB428-K41M                                     | pDSW208, P <sub>204</sub> ::ftsE <sup>K41M</sup> X, Amp <sup>r</sup>                       | This study |
| pSEB428-D162N                                    | pDSW208, P <sub>204</sub> ::ftsE <sup>D162N</sup> X, Amp <sup>r</sup>                      | This study |
| pSEB428-E163Q                                    | pDSW208, P <sub>204</sub> ::ftsE <sup>E163Q</sup> X, Amp <sup>r</sup>                      | This study |
| pSEB428-EX <sup>Δ152-161</sup>                   | pDSW208, P <sub>204</sub> ::ftsEX <sup>Δ152-169</sup> , Amp <sup>r</sup>                   | This study |
| pSEB428-E <sup>D162N</sup> X <sup>Δ152-161</sup> | pDSW208, P <sub>204</sub> ::ftsE <sup>D162N</sup> X <sup>Δ152-169</sup> , Amp <sup>r</sup> | This study |
| pT18-E                                           | pMB1, P <sub>lac</sub> ::T18-ftsE, Amp <sup>r</sup>                                        | This study |

|                                   |                                                                                                   |            |
|-----------------------------------|---------------------------------------------------------------------------------------------------|------------|
| pT18-EX                           | pMB1, P <sub>lac</sub> :: <i>T18-ftsEX</i> , <i>Amp</i> <sup>r</sup>                              | This study |
| pWM3014                           | pKT25, P <sub>lac</sub> :: <i>T25-ftsA</i> , <i>Kan</i> <sup>r</sup>                              | (24)       |
| pWM3014-A <sup>R300E</sup>        | pKT25, P <sub>lac</sub> :: <i>T25-ftsA</i> <sup>R300E</sup> , <i>Kan</i> <sup>r</sup>             | (22)       |
| pWM3014-A* <sup>R300E</sup>       | pKT25, P <sub>lac</sub> :: <i>T25-ftsA</i> <sup>R286W,R300E</sup> , <i>Kan</i> <sup>r</sup>       | This study |
| pWM3014-A* <sup>R300E,R63H</sup>  | pKT25, P <sub>lac</sub> :: <i>T25-ftsA</i> <sup>R286W,R300E,R63H</sup> , <i>Kan</i> <sup>r</sup>  | This study |
| pWM3014-A* <sup>R300E,G366D</sup> | pKT25, P <sub>lac</sub> :: <i>T25-ftsA</i> <sup>R286W,R300E,G366D</sup> , <i>Kan</i> <sup>r</sup> | This study |
| pWM3014-A* <sup>R300E,L367E</sup> | pKT25, P <sub>lac</sub> :: <i>T25-ftsA</i> <sup>R286W,R300E,L367E</sup> , <i>Kan</i> <sup>r</sup> | This study |
| pWM3014-A* <sup>R300E,D369R</sup> | pKT25, P <sub>lac</sub> :: <i>T25-ftsA</i> <sup>R286W,R300E,D369R</sup> , <i>Kan</i> <sup>r</sup> | This study |
| pWM3021                           | pUT18C, P <sub>lac</sub> :: <i>ftsA</i> , <i>Amp</i> <sup>r</sup>                                 | (24)       |
| pWM3021-A <sup>R300E</sup>        | pUT18C, P <sub>lac</sub> :: <i>ftsA</i> <sup>R300E</sup> , <i>Amp</i> <sup>r</sup>                | (22)       |
| pUT18                             | pMB1, P <sub>lac</sub> :: <i>T18</i> , <i>Amp</i> <sup>r</sup>                                    | (8)        |
| pUT18C                            | pMB1, P <sub>lac</sub> :: <i>T18</i> <sup>-</sup> , <i>Amp</i> <sup>r</sup>                       | (8)        |
| pX-T18                            | pUT18, P <sub>lac</sub> :: <i>ftsX-T18</i> , <i>Amp</i> <sup>r</sup>                              | This study |
| pZT18                             | pUT18, P <sub>lac</sub> :: <i>FtsZ-T18</i> , <i>Amp</i> <sup>r</sup>                              | (15)       |
| pZT25                             | pKNT, P <sub>lac</sub> :: <i>FtsZ-T25</i> , <i>Kan</i> <sup>r</sup>                               | (15)       |

Table S4. Oligonucleotide primers used in this study.

| Primer name  | Sequence (5'-3')                     |
|--------------|--------------------------------------|
| ftsA-R63H-F  | GTCAAGTGCGTACAACACGCCATTGACCAGGCAG   |
| ftsA-R63H-R  | CTGCCTGGTCAATGGCGTGTTGTACGCACTTGAC   |
| ftsA-G366D-F | CCGCTGAACATTACCGATTAAACGGATTATGCTC   |
| ftsA-G366D-R | GAGCATAATCCGTTAAATCGGTAATGTTTCAGCGG  |
| ftsA-L367E-F | CTGAACATTACCGGTGAAACGGATTATGCTCAG    |
| ftsA-L367E-R | CTGAGCATAATCCGTTTCACCGGTAATGTTAG     |
| ftsA-D369R-F | CATTACCGGTTTAAACGCGTTATGCTCAGGAGCCG  |
| ftsA-D369R-R | CGGCTCCTGAGCATAACGCGTTAAACCGGTAATG   |
| ftsB-A55V-F  | GAAACGATCAACTTTTTGTGCGAAATTGACGATCTC |
| ftsB-A55V-R  | GAGATCGTCAATTTTCGACAAAAAGTTGATCGTTTC |
| ftsB-G63D-F  | GACGATCTCAATGGCGACCAGGAGGCGCTCGAAG   |
| ftsB-G63D-R  | CTTCGAGCGCCTCCTGGTCGCCATTGAGATCGTC   |
| ftsB-G63S-F  | GACGATCTCAATGGCTCCCAGGAGGCGCTCGAAG   |
| ftsB-G63S-R  | CTTCGAGCGCCTCCTGGGAGCCATTGAGATCGTC   |
| ftsB-A66T-F  | CAATGGCGGCCAGGAGACGCTCGAAGAGCGTGC    |
| ftsB-A66T-R  | GCACGCTCTTCGAGCGTCTCCTGGCCGCCATTG    |
| ftsB-L67F-F  | GGCGGCCAGGAGGCGTTTGAAGAGCGTGCGC      |
| ftsB-L67F-R  | GCGCACGCTCTTCGAACGCCTCCTGGCCGCC      |
| ftsB-R70C-F  | GGAGGCGCTCGAAGAGTGTGCGCGTAATGAAC     |
| ftsB-R70C-R  | GTTTCATTACGCGCACACTCTTCGAGCGCCTCC    |
| ftsE-K41M-F  | CATTCCGGCGCAGGGATGAGTACCCTCCTGAAG    |

|                |                                                           |
|----------------|-----------------------------------------------------------|
| ftsE-K41M-R    | CTTCAGGAGGGTACTCATCCCTGCGCCGGAATG                         |
| ftsE-D162N-F   | GCGGTAAGTCTGGCGAACGAACCGACTGGTAAC                         |
| ftsE-D162N-R   | GTTACCAGTCGGTTCGTTCCGAGCAGTACCGC                          |
| ftsE-E163Q-F   | GTAAGTCTGGCGGACCAACCGACTGGTAACCTG                         |
| ftsE-E163Q-R   | CAGGTTACCAGTCGGTGGTCCGCCAGCAGTAC                          |
| ftsN-D5N-FW    | TGGCACAACGAAATTATGTACGCCGAGCCAACC                         |
| ftsN-D5N-BW    | CCGGTTGGCTGCGGCGTACATAATTTGTTGTGC                         |
| ftsN-WYAA-F    | CCAGAAGAACGCGCTCGCGCCATTAAGAGCTGG                         |
| ftsN-WYAA-R    | CCAGCTCTTTAATGGCGGAGCGGTTCTTCTGG                          |
| ftsL-G92D-F    | GAAGAGAATGCGCTCGACGACCATAGCCGGGTG                         |
| ftsL-G92D-R    | CACCCGGCTATGGTCGTCGAGCGCATTCTCTTC                         |
| ftsW-M269I-F   | GTTAACGCAATCGCTGATAGCGTTTGGTCGCGGCG                       |
| ftsW-M269I-R   | CGCCGCGACCAAACGCTATCAGCGATTGCGTTAAC                       |
| 5-NcoI-ftsE    | CACCCATGGCCCGAGAGGATTAACAATGATTG                          |
| 3-ftsX-HindIII | CACAAGCTTATTATTCAGGCGTAAAGTGG                             |
| ftsX161-F      | GAAGACGCACTGGGTGAGCTGGATATGCTGGAAGAA                      |
| ftsX152-R      | CTTCAGCATATCCAGCTCACCCAGTGGCTCTTAC                        |
| 5-BamHI-ftsE   | GACTGGATCCCAGACCATGGCCCGAGAG                              |
| 3-ftsX-EcoRI   | GACTGAATTCGCTTCAGGCGTAAAGTGGCG                            |
| 5-XbaI-ftsE    | GACTCTAGACCAGGTTCCAGCAGCCAGTGATGGATCGCTACATTCGCTTTGAACATG |
| 3-ftsE-KpnI    | GACTGGTACCGCGCTTATTCATGGCCAC                              |
| 3-ftsX-KpnI    | GACTGGTACCTTATTCAGGCGTAAAGTGGC                            |
| 5-SacI-ftsE    | GACTGAGCTCGACCATGGCCCGAGAGGATT                            |
| ftsX-R-HindIII | ATGCAAGCTTGTGAATAAATTAC                                   |

|                |                                 |
|----------------|---------------------------------|
| 5-ftsX-EcoRI   | CATGGAATTCAATAAGCGCGATGCAATC    |
| 3-ftsX-PstI    | CATGCTGCAGTTCAGGCGTAAAGTGGCGTA  |
| 5-ftsE-EcoRI   | GACGAATTCAGGCCCGAGAGGATTAACAATG |
| 3-Sall-ftsX    | GACTGTCGACTTCAGGCGTAAAGTGGCGTA  |
| 5-HindIII-ftsB | GACTAAGCTTGGGCTAATTTGTACTTTCCC  |
| 3-ftsB-EcoRI   | GATCGAATTCAGGACTTATGGCAATGAC    |
| 5-HindIII-ftsL | GCTAAGCTTCGTATTGTGAAACGTTTTATG  |
| 3-ftsL-EcoRI   | GACTGAATTCAGAGAACGCATGTCGCCCTC  |
| 5-HindIII-ftsW | GACTAAGCTTCGGTCGTGACGGCGCGCAGC  |
| 3-ftsW-EcoRI   | GACTGAATTCACGCAGACCAGAGA        |
| 5-BamHI-ftsX   | GACTGGATCCTGGTCACTTGCATGGAGGC   |
| 5-ftsL-seq     | GGCAGGGTTACCGATGACTG            |
| 5-ftsI-seq     | GCGACATGCGTTCTCTTCGC            |
| m-ftsI-seq     | GAAAGAGGCGATGCGTAACC            |
| 3-ftsI-seq     | GATCGCCCGCCGAGCCACA             |
| 5-ftsW-seq     | GAAACTATGGAACAGGCGATGC          |
| 3-ftsW-seq     | GCGAACTTGCCAACCCTGAG            |
| 5-ftsQ-seq     | GCCAATACCTCACCGGGTATG           |
| m-ftsQ-seq     | CGTTCCTGGCAGTTGACGCTGA          |
| m-ftsA-seq     | GCAGGCAAAAGTGACCTGATC           |
| 3-ftsA-seq     | GAGTCACATCTTAACGGTGAAG          |
| m-ftsZ-seq     | GATGCGTTTGGCGCAGCGAAC           |
| 3-ftsZ-seq     | CGTATTATCTCGCCAAATTACC          |
| 5-ftsB-seq     | GGGCTAATTTGTACTTTCCC            |

|            |                      |
|------------|----------------------|
| 3-ftsB-seq | CCAGGACTTATGGCAATGAC |
|------------|----------------------|
